1  
2  
3  
4  
5  
6  
7  
8  
9  
10  
11  
12  
13  
14  
15  
16  
17  
18  
19  
20  
21  
22  
23  
24  
25  
26  
27  
28  
29  
30  
31  
32

**Postsynaptic plasticity of cholinergic synapses underlies the induction and expression of appetitive memories in *Drosophila***

Carlotta Pribbenow<sup>1</sup>, Yi-chun Chen<sup>1,\*</sup>, Michael-Marcel Heim<sup>1,\*</sup>, Desiree Laber<sup>1,\*</sup>, Silas Reubold<sup>1,\*</sup>, Eric Reynolds<sup>1,\*</sup>, Isabella Balles<sup>1</sup>, Raquel Suárez Grimalt<sup>1,2</sup>, Carolin Rauch<sup>1</sup>, Jörg Rösner<sup>4</sup>, Tania Fernández-d.V. Alquicira<sup>1</sup>, David Oswald<sup>1-3, +</sup>

<sup>1</sup>Institute of Neurophysiology, Charité – Universitätsmedizin Berlin, corporate member of Freie Universität Berlin and Humboldt-Universität zu Berlin, and Berlin Institute of Health, Charitéplatz 1, 10117 Berlin, Germany

<sup>2</sup>Einstein Center for Neurosciences Berlin, Charitéplatz 1, 10117 Berlin

<sup>3</sup>NeuroCure, Charité – Universitätsmedizin Berlin, corporate member of Freie Universität Berlin and Humboldt-Universität zu Berlin, and Berlin Institute of Health, Charitéplatz 1, 10117 Berlin, Germany

<sup>4</sup>NWFZ, Charité – Universitätsmedizin Berlin, corporate member of Freie Universität Berlin and Humboldt-Universität zu Berlin, and Berlin Institute of Health, Charitéplatz 1, 10117 Berlin, Germany

\* equal contribution, in alphabetical order

+correspondence: [david.owald@charite.de](mailto:david.owald@charite.de)

33 In vertebrates, memory-relevant synaptic plasticity involves postsynaptic  
34 rearrangements of glutamate receptors. In contrast, previous work indicates that  
35 *Drosophila* and other invertebrates store memories using presynaptic plasticity of  
36 cholinergic synapses. Here, we provide evidence for postsynaptic plasticity at  
37 cholinergic output synapses from the *Drosophila* mushroom bodies (MBs). We find that  
38 the nicotinic acetylcholine receptor (nAChR) subunit  $\alpha 5$  is required within specific MB  
39 output neurons (MBONs) for appetitive memory induction, but is dispensable for  
40 aversive memories. In addition, nAChR  $\alpha 2$  subunits mediate memory expression  
41 downstream of  $\alpha 5$  and the postsynaptic scaffold protein Dlg. We show that  
42 postsynaptic plasticity traces can be induced independently of the presynapse, and  
43 that *in vivo* dynamics of  $\alpha 2$  nAChR subunits are changed both in the context of  
44 associative and non-associative memory formation, underlying different plasticity  
45 rules. Therefore, regardless of neurotransmitter identity, key principles of postsynaptic  
46 plasticity support memory storage across phyla.

47

48

49 Keywords: learning and memory; postsynaptic plasticity; cholinergic synapses;  
50 receptor dynamics; *Drosophila*; mushroom bodies

51

52

## 53 **Introduction**

54

55 Changing the strength of defined chemical synaptic connections within associative  
56 networks is widely believed to be the basis of memory storage<sup>1-3</sup>. However, it is unclear  
57 and frequently debated to what degree underlying neurophysiological and molecular  
58 mechanisms are evolutionarily conserved. One main difference between vertebrates  
59 and invertebrates is that memory-storing synapses in vertebrates use glutamate as  
60 their primary transmitter, while those in invertebrates (at least for *Drosophila*  
61 *melanogaster* and *Sepia officinalis*) use acetylcholine<sup>4-6</sup>. Furthermore, it is widely  
62 believed that invertebrates utilize presynaptic and not postsynaptic plasticity, while  
63 associations in vertebrates can depend on both presynaptic mechanisms, but primarily  
64 postsynaptic rearrangements of neurotransmitter receptors.

65

66 Detailed knowledge of the anatomical wiring and functional signaling logic of  
67 the *Drosophila* mushroom bodies (MBs)<sup>5,7-21</sup> allows one to address whether, despite  
68 the use of different neurotransmitter systems, memory storage modes are functionally

69 comparable or evolutionarily conserved. The weights of Kenyon cells (KCs) to MB  
70 output neuron (MBON) synapses are modulated by dopaminergic neurons (DANs),  
71 which anatomically divide the MBs into at least 15 functional compartments, where  
72 information is stored on appetitive and aversive associations, in addition to non-  
73 associative learning such as the relative familiarity of an odor<sup>5,7-12,15,22,23</sup>.

74 Studies so far have identified several traits pointing towards presynaptic  
75 storage mechanisms within the KCs during memory formation<sup>24-27</sup>. Indeed, studies that  
76 have blocked neurotransmitter release from KCs during learning<sup>28-31</sup> have brought  
77 postsynaptic contributions to synaptic plasticity into question.

78  
79 In vertebrates, typically, long-term changes<sup>2,32,33</sup> are mediated via NMDA-  
80 sensitive glutamate receptors (NMDAR) that induce ('induction') an expression phase  
81 ('expression') through changed glutamatergic AMPA receptor (AMPA) dynamics in  
82 dependence of postsynaptic scaffolds like PSD-95<sup>34</sup>. Invertebrate nAChRs in principle  
83 could take over similar functions to their glutamatergic counterparts in vertebrates,  
84 despite their differing molecular characteristics<sup>35</sup>. Indeed, nAChRs are pentamers that  
85 can be composed of homomeric assemblies of  $\alpha$  subunits or heteromeric combinations  
86 of different  $\alpha$  and  $\beta$  subunits. The composition of subunits determines the physiological  
87 properties of the nAChRs<sup>35-38</sup>, and synaptic weights could, in theory, be adjusted  
88 through the exchange of receptor subunits or entire complexes.

89  
90 Here, we capitalize on the genetic accessibility to individual output neurons of  
91 the MBs to directly test whether postsynaptic receptors play a role in memory storage.  
92 Using combined neurophysiological, behavioral, light microscopic and molecular  
93 approaches, we establish a sequential role for nAChR subunits in appetitive memory  
94 storage at the level of MBONs. Using artificial training protocols, we demonstrate that  
95 postsynaptic calcium transients can change in response to concurrent activation of  
96 dopaminergic neurons and application of acetylcholine, circumventing KC output.  
97 Blocking KC output during appetitive, but not aversive, learning abolishes memory  
98 performance. Moreover, specific knock-down of the  $\alpha 5$  nAChR subunit, but none of the  
99 other six  $\alpha$  subunits, in the M4/6 MBONs (also known as MBON- $\gamma 5\beta'2a$ , MBON- $\beta'2mp$ ,  
100 MBON- $\beta 2\beta'2a$  and MBON- $\beta'2mp$  bilateral) - an output junction involved in coding  
101 appetitive and aversive memories - impairs immediate appetitive memories. Knock-  
102 down of  $\alpha 2$  or  $\alpha 5$ , however, interferes with 3-hour appetitive memories, as does knock-  
103 down of the scaffold Discs large (Dlg). We report differential distribution of  $\alpha$  subunits  
104 throughout the MB and demonstrate that subunit dynamics are changed through

105 plasticity protocols. In addition, postsynaptically expressed non-associative familiarity  
106 learning also depends on  $\alpha 5$  and  $\alpha 2$  signaling as well as  $\alpha 2$  dynamics. We hypothesize  
107 that, in *Drosophila*, nAChR subunits  $\alpha 5$  and  $\alpha 2$  take roles similar to NMDA and AMPA  
108 receptors in vertebrates for memory induction and expression, indicating that the  
109 general principle for postsynaptic plasticity independent of the neurotransmitter system  
110 used, could be conserved throughout evolution.

111

112

## 113 **Results**

114

### 115 ***Neurotransmitter release from Kenyon cells is required for appetitive learning***

116

117 One key argument in favor of exclusively presynaptic memory storage mechanisms in  
118 invertebrates is based on experiments suggesting that blocking KC or KC subset  
119 output selectively during learning leads to unaltered or mildly changed memory  
120 performance<sup>28-31</sup>. If the postsynapse need not see the neurotransmitter during training,  
121 it would likely be dispensable for memory induction. We revisited such experiments  
122 and blocked KC output during T-maze training, exposing the animals either to sugar-  
123 odor or shock-odor pairings (Fig. 1 a-b, Supplementary Fig. 1a-b).

124

125 We expressed the temperature-sensitive Dynamin mutant UAS-*Shibire*<sup>TS</sup> (Shi) at the  
126 level of KCs, trained animals at the restrictive temperature, and tested for memory  
127 performance at permissive temperature 30 minutes later. These manipulations allowed  
128 us to interfere with the synaptic vesicle exo-endocycle specifically during conditioning,  
129 while reinstating neurotransmission afterwards. Consistent with previous reports<sup>28,30,31</sup>,  
130 a slight drop in aversive memory performance (Fig. 1a) was not statistically different  
131 from controls and also observable in the permissive temperature controls (see  
132 Supplementary Fig. 1a). In contrast, memories were completely abolished following  
133 block of KC output during appetitive training (Fig. 1b, Supplementary Fig. 1b).

134

135 We next asked whether the requirement for neurotransmission during appetitive  
136 learning was specific to the KC output synapse. To do so, we took an analogous  
137 approach, this time blocking neurotransmission from downstream M4/6 (MBON-  
138  $\gamma 5\beta'2a$ , MBON- $\beta'2mp$ , MBON-  $\beta 2\beta'2a$  and MBON- $\beta'2mp$  bilateral) MBONs during  
139 appetitive training. We focused on the M4/6 set of MBONs as blocking these during  
140 memory retrieval crucially interferes with appetitive memory expression, while, on a

141 physiological level, memory-related plasticity is observable<sup>5,7,13</sup>. When blocking M4/6  
142 during appetitive training, but not retrieval, memory scores were similar to those of  
143 control groups (Fig. 1c), suggesting that the sites of plasticity are likely to be the KC to  
144 MBON synapse in general, with one major site specifically being the connections  
145 between KCs and M4/6 MBONs.

146

147 Thus, our experiments suggest that neurotransmitter release from KCs during training  
148 is required for the formation of appetitive memories but is less crucial for the formation  
149 of aversive memories.

150

151 ***The  $\alpha 5$  nAChR subunit is required for induction, and  $\alpha 2$  for expression of***  
152 ***appetitive memories***

153

154 Requirement for presynaptic neurotransmitter release alone does not necessarily  
155 mean that postsynaptic plasticity is involved in appetitive memory formation. To  
156 address a putative role for postsynaptic sensitivity in memory formation, we next  
157 interfered with the postsynaptic receptor composition. Given that KCs are cholinergic,  
158 we screened for memory requirement of all nicotinic  $\alpha$ -subunits at the level of the M4/6  
159 MBONs (Fig. 2) using genetically-targeted RNAi. We concentrated on the nAChR  $\alpha$   
160 subunits as they are crucial components for all possible heteromeric or homomeric  
161 receptor pentamers<sup>36</sup>.

162 When flies were tested for immediate appetitive memory, only knock-down of the  $\alpha 5$   
163 subunit produced performance that was statistically different from the controls (Fig. 2a,  
164 Supplementary Fig. 2a,i). Testing 3-hour appetitive memory performance revealed a  
165 significant memory impairment in flies with  $\alpha 5$ ,  $\alpha 1$  and  $\alpha 2$  knock-down (Fig. 2b,  
166 Supplementary Fig. 2b,j-m). While  $\alpha 5$  subunits can form homomeric channels<sup>38</sup>,  $\alpha 1$   
167 and  $\alpha 2$  can partake in heteromeric channels together<sup>37</sup>. We therefore concentrated on  
168 the  $\alpha 5$  and  $\alpha 2$  nAChR subunits in subsequent analyses.

169

170 To exclude developmental contributions to the observed memory defects, we repeated  
171 the immediate and 3-hour appetitive memory experiments for  $\alpha 5$  as well as the 3-hour  
172 appetitive memory experiments for  $\alpha 2$  knock-down animals, while suppressing RNAi  
173 expression using the temperature-sensitive Gal4 repressor Gal80<sup>ts</sup> during  
174 development, up until 3-5 days before memory testing. Memory impairments were  
175 confirmed in all cases (Fig. 2e-g), but not detected in temperature controls  
176 (Supplementary Fig. 2e-g).

177 We also tested aversive immediate and 3-hour memory using the same genetic  
178 settings (Fig. 2c and d, Supplementary Fig. 2c and d). None of the knock-downs  
179 differed significantly from controls, with the exception of  $\alpha 7$  at the 3-hour time point.  
180 As, comparable to vertebrate systems,  $\alpha 7$  also plays a significant role at presynaptic  
181 neurites<sup>39</sup>, we did not follow up on this observation in this study.

182

183 As M4/6 output is also required for appropriate aversive memory expression<sup>7,11</sup>,  $\alpha 2$  and  
184  $\alpha 5$  knock-down not impacting aversive memory performance suggested that the  
185 observed appetitive memory impairments were not simply a consequence of lost  
186 postsynaptic sensitivity to acetylcholine. To further corroborate this, we turned to a  
187 brain explant preparation and applied acetylcholine focally to the M4/6 dendrites  
188 expressing the calcium indicator GCamp6f of control and knock-down animals in the  
189 presence of the blocker of voltage-gated sodium channels TTX<sup>4,40</sup>. Dendritic calcium  
190 transients were comparable between all groups (Supplementary Fig. 3h). We also  
191 observed presynaptic sensitivity in all genotypes (*not shown*) after applying  
192 acetylcholine to the presynaptic MBON boutons, making presynaptic deficits following  
193  $\alpha 2$  or  $\alpha 5$  knock-down unlikely.

194

195 Therefore, we conclude that, at the level of M4/6 neurons, immediate and 3-hour  
196 appetitive memories are affected by knock-down of the  $\alpha 5$  subunit, whereas 3-hour  
197 memories also require the presence of  $\alpha 1$ - and  $\alpha 2$ -bearing receptors in addition. The  
198 observed temporal profile of requirement for memory of  $\alpha 1$ - and  $\alpha 2$ -bearing receptors  
199 relative to those incorporating the  $\alpha 5$  subunit, potentially points to a temporal sequence  
200 of receptor function during initial memory formation and subsequent memory  
201 expression.

202

### 203 ***The postsynaptic scaffold Dlg regulates both 3-hour appetitive memory and $\alpha 2$*** 204 ***levels***

205

206 At mammalian glutamatergic synapses, such sequential models underly postsynaptic  
207 plasticity and changes in synaptic weight rely on receptor stabilization or  
208 destabilization that can be mediated via scaffolding molecules. One such scaffold,  
209 PSD-95, that is mostly involved in AMPA receptor dynamics, is conserved at  
210 *Drosophila* synapses. The orthologue Dlg<sup>41,42</sup> is expressed throughout the brain, with  
211 mushroom body compartment-specific enrichment noted previously<sup>43</sup> (also compare  
212 Fig. 4a,b). We investigated appetitive and aversive memory performance following

213 M4/6-specific knock-down of Dlg (Fig. 2a-d, Supplementary Fig. 2a-d). Performance  
214 scores comparable to controls were found for both immediate appetitive and aversive  
215 memories (Fig. 2a, c, d, Supplementary Fig. 2). Dlg knock-down, however, specifically  
216 abolished 3-hour appetitive memory performance (Fig. 2b, Supplementary Fig. S2b),  
217 while Gal80<sup>ts</sup> experiments excluded a developmental defect (Fig. 2h, Supplementary  
218 Fig. 2h). The temporal profile of Dlg requirement therefore closely matched that of  $\alpha 2$   
219 nAChR subunits.

220

221 ***Bypassing the presynapse: induction of persistent associative plasticity in the***  
222 ***postsynaptic compartment***

223

224 In order to directly test whether postsynaptic plasticity could take place at the level of  
225 MBONs, we next conducted neurophysiological proof-of-principle experiments.

226

227 To minimize plasticity induced by acute sensory experiences or general network  
228 activity, we used an explant brain preparation bathed in TTX from flies expressing the  
229 red light-activatable channelrhodopsin CsChrimson in a subset of dopaminergic  
230 neurons (PAM neurons; R58E02-LexA) and the calcium indicator GCaMP6f in M4/6  
231 MBONs. Recent ultrastructural data has revealed direct synaptic connections between  
232 dopaminergic neurons and MBONs<sup>23,44</sup>, giving rise to a motif that could potentially  
233 circumvent presynaptic KCs during plasticity induction (see schematic in Fig. 3a).

234

235 While dopamine release was controlled by red light flashes, neurotransmitter release  
236 from KCs was mimicked by focal pressure ejection of acetylcholine to the dendrites of  
237 the M6 (MBON- $\gamma 5\beta'2a$ ) MBON (M6 was chosen for technical reasons, as these  
238 neurons are most accessible for the used imaging technique). We first verified that KC  
239 presynapses do not respond to acetylcholine application<sup>4</sup>, using both calcium imaging  
240 and imaging of synaptic vesicle exocytosis at the level of KC axons (Fig 3c and  
241 Supplementary Fig 3i,j). The observed absence of KC activation, with acetylcholine  
242 being applied from an external source (Fig. 3a), minimized noise attributable to  
243 possible presynaptic contributions.

244 Our protocols consisted of training phases where we differentiated between temporal  
245 pairing of acetylcholine and optogenetic activation of dopaminergic neurons ('paired',  
246 Fig. 3b, h), dopamine only ('red-light only', Fig. 3b,e,g), or 'acetylcholine only' (Fig.  
247 3b,d,f) (also see Supplementary Fig. 3). Acetylcholine application preceded (pre) and  
248 followed each training step (post) to establish baseline responses and to assess  
249 synaptic weights following training ('testing'). We found that test responses were

250 significantly elevated following the paired condition (Fig. 3h). This potentiation was not  
251 observed when testing after acetylcholine only or dopamine only training (Fig. 3f,g).  
252 Importantly, we also did not observe any changes when pairing acetylcholine  
253 application with red light in non-CsChrimson-expressing controls (Supplementary Fig.  
254 3f,g). Finally, we varied our training and testing in extended protocols, with all  
255 conditions applied within a single brain (Fig. S3c-e). Consistently, while reproducing  
256 the observed potentiation after paired training, dopaminergic or cholinergic training did  
257 not elicit plasticity. Of note, dopamine-only training reversed the observed potentiation,  
258 but only if following paired training within the same animal (*not shown*).

259

260 Because we are using global acetylcholine application instead of sparse activation of  
261 single synapses, these experiments likely do not reflect *in vivo* physiological settings<sup>7</sup>.  
262 However, our proof of principle experiments demonstrate that postsynaptic sensitivity  
263 can change independently of the presynapse.

264

265 We next addressed, whether the observed plasticity could be tied to the requirement  
266 of cholinergic receptor plasticity. To do so, we repeated our paired training protocols,  
267 while expressing RNAi to  $\alpha 2$  in M4/6 neurons (Fig. 3i). Indeed,  $\alpha 2$  knockdown  
268 abolished plasticity, confirming that nicotinic receptors are the underlying substrates  
269 for molecular changes.

270

### 271 ***Non-uniform distribution of nAChR $\alpha$ -subunits throughout MB compartments***

272

273 Our behavioral and physiological data so far suggested that  $\alpha 2$ -containing nicotinic  
274 receptors are involved in appetitive memory storage. To test whether receptor levels  
275 were interdependent, we made use of a newly established CRISPR-based genomic  
276 collection of GFP-tagged endogenous nAChR subunits (Woitkuhn, Pribbenow,  
277 Matkovic, Sigrist and Oswald, *unpublished*) covering all  $\alpha$  subunits (with the exception  
278 of  $\alpha 3$ ) under control of their endogenous promoter, allowing for analyses of receptor  
279 distribution and dynamics in a dense neuropile *in situ*.

280 We first characterized receptor subunit signals throughout the 15 MB compartments,  
281 several of which have been shown to be involved in the encoding of specific memories.  
282 We found a non-uniform distribution (Fig. 4a,b, Supplementary Fig. 4) that was unique  
283 for each subunit, indicating considerable heterogeneity of receptor composition.

284



285  $\alpha 5$ , which is required for immediate and 3-hour appetitive memories, was abundant  
286 throughout the  $\gamma$  lobe, including  $\gamma 5$  and slightly less at the level of  $\beta'2$ , the compartments  
287 that are innervated by M4/6 dendrites.  $\alpha 2$  subunits, required for 3-hour appetitive  
288 memories, showed similarly high relative abundance in  $\beta'2$  (innervated by M4 and in  
289 parts by M6) and  $\gamma 5$  (innervated by M6) (Fig. 4a,b). Of note, none of these subunits  
290 appeared as abundant in  $\gamma 1$ , the output compartment of the MVP2 MBON that stores  
291 aversive memories<sup>19</sup>, while baseline fluorescence levels were intermediate and rather  
292 low for  $\alpha 5$  and  $\alpha 2$  at the level of the  $\alpha'3$ , the output compartment harboring MBONs  
293 involved in non-associative odor familiarity learning<sup>15</sup>.

294 We next evaluated, whether the fluorescent signals of the  $\alpha 2$  and  $\alpha 5$  subunits (with  $\alpha 5$   
295 potentially functioning upstream of  $\alpha 2$ , Fig. 2) observed in the  $\beta'2$  and  $\gamma 5$  compartments  
296 were derived from receptors within the dendritic processes of M4/6. To do so, we  
297 performed cell-specific knock-down experiments using VT1211-Gal4 and quantified  
298 the relative fluorescent signal of the knock-down compartment relative to the  
299 neighboring unmanipulated compartments (Fig. 4c-f).

300 Knock-down of the  $\alpha 5$  nAChR subunit reduced the relative  $\alpha 5^{\text{GFP}}$  signal specifically and  
301 significantly in  $\gamma 5$  and  $\beta'2$  (Fig. 4c,d).  $\alpha 5$  abundance was, however, unaltered when  
302 knocking-down  $\alpha 2$  or Dlg, which is in line with  $\alpha 5$  functioning as a trigger for plasticity  
303 processes.

304

305 Likewise, confirming that the observed signal was derived from M4/6 MBON dendrites,  
306  $\alpha 2$  knock-down reduced the relative  $\alpha 2^{\text{GFP}}$  levels significantly throughout the  $\beta'2$  and  
307  $\gamma 5$  compartments (Fig. 4e,f). Strikingly, we also observed reduced  $\alpha 2$  nAChR subunit  
308 levels following  $\alpha 5$  subunit in the  $\beta'2$  compartment or Dlg knock-down in the  $\beta'2$  and  
309  $\gamma 5$  compartments (Fig. 4e,f), which is in line with a sequential requirement of receptor  
310 subunits during memory formation (also compare behavioral data in Fig. 2).

311

312 Our data therefore are consistent with  $\alpha 5$  nAChR subunits and Dlg functioning  
313 upstream of  $\alpha 2$  subunit-positive receptors in a consecutive plasticity sequence at the  
314 level of M4/6 MBONs, at least within the  $\beta'2$  compartment.

315

### 316 ***nAChR subunits shape synaptic MB output properties***

317

318 We next focused on implications of  $\alpha 2$  subunit knock-down on postsynaptic function of  
319 M4/6 MBONs. Axonal calcium transients have previously been shown to be decreased

320 following knock-down of  $\alpha$  subunits<sup>4</sup>. However, both increased or decreased  
321 postsynaptic drive could lead to changed dendritic integration properties underlying  
322 reduced signal propagation<sup>45</sup>.

323 We expressed GCaMP6f in M4/6 MBONs, and exposed the flies repeatedly to  
324 alternating puffs of the odors octanol (OCT) and MCH (Supplementary Fig. 5a,b). We  
325 focused our experiments on the  $\beta$ '2 compartment (Fig. 5), as this is innervated by both  
326 M4 and 6 MBONs. Initial dendritic odor responses were comparable between  $\alpha$ 2  
327 subunit knock-down and controls (Fig. 5b,c), while initial odor-evoked dendritic calcium  
328 transients were elevated following knock-down of  $\alpha$ 5 (Fig. 5b,c). Importantly, while  
329 control animals showed a relative facilitation in odor-specific calcium transients after  
330 several exposures of OCT, we did not detect this in  $\alpha$ 2 knock-down animals (Fig. 5d,e).  
331 Odor responses following  $\alpha$ 5 knock-down, however, clearly depressed after multiple  
332 odor exposures (Fig. 5f), indicating that lack of  $\alpha$ 5 can lead to pre-potentiated synaptic  
333 transmission, while  $\alpha$ 2 nAChR subunit knock-down interfered with baseline synaptic  
334 properties to a lesser extent. Importantly, we did not observe any changes in calcium  
335 signals at the level of the corresponding KC axons, further supporting that the observed  
336 plasticity was of postsynaptic origin (Supplementary Fig. 5h,i). The observed  
337 facilitation in M4/6 of controls was not apparent when using repeated application of  
338 MCH, indicating that the observed non-associative plasticity can be graded  
339 (Supplementary Fig. 5e).

340

341 Given the limited effect of  $\alpha$ 2 knock-down on baseline transmission, we next tested  
342 whether interfering with  $\alpha$ 2 would change responses in M4/6 following associative  
343 appetitive odor/sugar pairing. We performed *in vivo* training under the microscope (Fig.  
344 5b) experiments using an absolute paradigm, pairing odor exposure with *ad libido*  
345 sugar feeding during training. We conditioned using MCH, because we did not detect  
346 strong differences in initial odor responses between controls and  $\alpha$ 2 knock-down  
347 animals (see above, Supplementary Fig. 5). Comparing odor responses before and  
348 after pairing revealed a marked depression for control animals in line with previous  
349 observations<sup>7,17</sup> (Fig 5g). Importantly, after knock-down of  $\alpha$ 2, however, this observed  
350 depression was no longer apparent (Fig 5h). Of note, and in line with a tight interplay  
351 of  $\alpha$ 2 and  $\alpha$ 5, knock-down of  $\alpha$ 5 also prevented depression (*not shown*).

352

353 Together, our data point towards a mechanism, where nicotinic receptor subunits  
354 shape synaptic properties (Fig. 5), and  $\alpha$ 2 is directly involved in plasticity processes.

355

356 ***In vivo imaging of postsynaptic receptor plasticity reveals altered  $\alpha 2$  dynamics***

357

358 Structural changes at the level of the receptor composition are hallmarks of  
359 postsynaptic plasticity expression in vertebrates. Typically, rearrangements can be  
360 measured by altered dynamics of receptors that can reflect incorporation or removal  
361 of receptor subunits. We next sought to test whether dynamic receptor behavior could  
362 serve as a structural correlate of cholinergic postsynaptic memory trace expression.  
363 To do so, we turned to *in vivo* imaging experiments of the endogenously tagged  $\alpha 2$   
364 subunit (Fig. 6, Supplementary Fig. 6). Flies were either tethered under the two (Fig.  
365 6) or the single photon confocal (Fig. 7) microscope and subjected to training protocols.  
366 Endogenous *in situ* receptor dynamics at the level of the  $\beta'2$  compartment of the MB  
367 were estimated as fluorescence recovery after photobleaching (FRAP), allowing us to  
368 also pick up small increases in signal (Fig. 6a-c).

369 We conducted artificial appetitive training protocols by exposing the tethered animals  
370 to odor with or without simultaneous focal injection of dopamine to the  $\beta'2$  compartment  
371 of the MB (Fig. 6a-c). We performed two different sets of protocols comparing recovery  
372 of  $\alpha 2^{\text{GFP}}$  (Fig. 6b, Supplementary Fig. 6b). Following photobleaching, individual flies  
373 were exposed to one of three conditions: focal injection of dopamine, odor, or odor  
374 paired with focal dopamine injection. Flies exposed to OCT showed increased  
375 fluorescence recovery when compared to flies that received only dopamine injections  
376 or odor paired with dopamine (Fig. 6d,e). Dopamine, therefore, does not induce  
377 plasticity on its own, and further, it suppresses odor-induced recovery when applied  
378 simultaneously with an odor. To rule out that recovery depended on the type of odor  
379 used, we also conducted similar experiments using MCH, this time testing all  
380 conditions within the same fly. After photobleaching, flies were successively exposed  
381 to a focal injection of dopamine, an odor stimulus, or odor paired with focal dopamine  
382 injection. Again, we observed significant recovery in the odor only condition, whereas  
383 dopamine suppressed odor-induced plasticity (Supplementary Fig. 6d,e). Of note, we  
384 did not observe any  $\alpha 5^{\text{GFP}}$  recovery using similar protocols (*not shown*), in line with a  
385 role of  $\alpha 5$  functioning upstream of  $\alpha 2$ .

386

387 Thus, our data indicate that pairing odor with dopamine stalls  $\alpha 2^{\text{GFP}}$  dynamics  
388 potentially by either stabilizing the already present amount of receptor or hindering new  
389 incorporation of  $\alpha 2$ -containing receptors. Interestingly the opposite, increased receptor  
390 dynamics, is observed after odor exposure without reinforcer. Thus, stalling  $\alpha 2$

391 dynamics can be correlated to a relative depression of M4/6 MBON synapses<sup>7,13</sup>  
392 following appetitive conditioning.

393

394 We next asked whether postsynaptic plasticity expressed through  $\alpha 5$  and  $\alpha 2$  subunit  
395 interplay could underlie other forms of learning represented in the MBs. We turned to  
396 the  $\alpha '3$  compartment at the tip of the vertical MB lobe that has previously been shown  
397 to mediate odor familiarity learning. This form of learning allows the animal to adapt its  
398 behavioral responses to new odors and, importantly, permits for assaying direct odor-  
399 related plasticity. Importantly, this compartment follows different plasticity rules,  
400 because the odor serves as both the conditioned (activating KCs) and unconditioned  
401 stimulus (activating corresponding dopaminergic neurons)<sup>15</sup>. While allowing us to test  
402 whether the so far uncovered principles could also be utilized in a different context, it  
403 also provides a less complex test bed to investigate whether  $\alpha 5$  functions upstream of  
404  $\alpha 2$  dynamics.

405

#### 406 ***Familiarity learning alters postsynaptic receptor dynamics***

407

408 Confirming previous observations<sup>15</sup>, a repeated odor application paradigm (Fig. 7a) led  
409 to the depression of postsynaptic calcium transients at the level of the  $\alpha '3$  MBONs (Fig.  
410 7b). Importantly, we did not detect a corresponding depression on the presynaptic side  
411 when imaging arbors of a sparse  $\alpha ' \beta '$  KC driver line within  $\alpha '3$  (Fig. 7b), further  
412 indicating that memories were predominantly stored postsynaptically in this  
413 compartment. We next performed *in vivo* FRAP experiments following familiarity  
414 learning paradigms. After odor training, we observed clear recovery rates of  $\alpha 2^{\text{GFP}}$   
415 signals compared to the control group, however not of  $\alpha 5^{\text{GFP}}$  or  $\text{Dlg}^{\text{GFP}}$  (Fig. 7 c-f,  
416 Supplementary Fig. 7). Therefore, increased  $\alpha 2$  subunit dynamics are triggered  
417 through training events and, at the level of the  $\alpha '3$  compartment, accompany  
418 postsynaptic depression of the MBONs.

419

420 To invariantly test whether recovery in the  $\alpha '3$  compartment were attributable to  $\alpha 2$  at  
421 the level of the  $\alpha '3$  MBONs, we repeated recovery experiments while knocking-down  
422  $\alpha 2$ . In accordance with the observed signal recovery deriving from MBONs, no  
423 recovery was observed (Fig. 7g). Likewise, we did not observe  $\alpha 2^{\text{GFP}}$  recovery when  
424 performing specific  $\alpha 5$  knock-down in  $\alpha '3$  MBONs (Fig. 7g), confirming a role of  $\alpha 5$   
425 upstream of  $\alpha 2$  also in this compartment.

426

427  ***$\alpha$ 5 subunits govern induction and  $\alpha$ 2 subunits expression of non-associative***  
428 ***familiarity learning***

429

430 Finally, we tested whether interfering with  $\alpha$ 5 and  $\alpha$ 2 nAChR subunits would also  
431 impact familiarity learning behavior (Fig. 8).

432 Flies were covered in dust and subjected to repeated odor exposures. As expected,  
433 control flies readily groomed to remove the dust, however typically stopped this action  
434 when detecting the novel odor (Fig. 8a-c). Over subsequent trials control flies learned  
435 that this odor was familiar and stopped reacting to the stimulus, continuing grooming  
436 (Fig. 8a-c, Supplementary Fig. 8). Expressing RNAi to the  $\alpha$ 2 subunit at the level of the  
437  $\alpha$ '3 MBONs clearly impacted learning: flies learned with decreased efficacy and only  
438 after several trials (Fig. 8a-d). Strikingly,  $\alpha$ 5 RNAi-expressing flies failed to stop  
439 grooming even to the first stimulus. Indeed, they acted as if they had already learned  
440 that an odor was familiar (Fig. 8a-d).

441 Together, our data suggest that  $\alpha$ 5 induces memory formation and lack of  $\alpha$ 5 leads to  
442 fully potentiated synapses. Subsequent expression of memory traces requires  $\alpha$ 2-  
443 containing receptors. Importantly, recovery accompanies synaptic depression at the  
444 level of the  $\alpha$ '3 MBONs, while being suppressed by paired training in the  $\beta$ '2  
445 compartment. Moreover,  $\alpha$ 2 can be involved in both depression and facilitation of  
446 synapses. Thus, synapses can bidirectionally utilize plasticity of the same receptor  
447 subunit for storing different types of information (see model in Fig. 9).

448

449

450 **Discussion**

451

452 Synaptic weight changes are widely recognized as substrates for memory storage  
453 throughout the animal kingdom. How synapses adapt in order to change their efficacy  
454 during learning has been a focus of attention over the last decades. While it is  
455 undisputed that both pre- and postsynaptic mechanisms of memory storage exist in  
456 vertebrates (albeit with an emphasis on postsynaptic mechanisms), invertebrate  
457 memory-related synaptic plasticity has been largely localized to the presynaptic  
458 compartment, although some debates exist<sup>1</sup>. The core of the debate boils down to a  
459 key question: do vertebrates and invertebrates use similar mechanisms to store  
460 memories or are there fundamental differences? A first clear difference appears to be

461 the use of different neurotransmitter systems, glutamate and acetylcholine  
462 respectively, in the vertebrate and *Drosophila* learning centers<sup>4</sup>.

463

#### 464 ***Postsynaptic plasticity in appetitive memory storage***

465

466 Here, we use the genetic tractability of the *Drosophila* system to directly address  
467 postsynaptic plasticity during memory storage in invertebrates. Large amounts of  
468 evidence from *Drosophila* so far suggests a presynaptic role of memory storage<sup>24–28,46</sup>.  
469 Moreover, it was demonstrated that block of KCs during learning does not interfere  
470 with memory performance<sup>28,30,31</sup>, although some studies blocking KC subsets did find  
471 impairments<sup>29,47</sup> in the context of short-term appetitive memory. Lack of necessity to  
472 detect neurotransmitter by the postsynapse in the course of memory storage was  
473 interpreted as evidence for a presynaptic storage mechanism. If the receptor does not  
474 ‘see’ the signal, it is dispensable for ‘interpreting’ it. Here, we revisited such  
475 experiments using a pan-KC driver and found, in accordance with previous studies,  
476 only mild, if any, requirement for aversive memory storage. We, however, fully  
477 abolished appetitive memories (Fig. 1) by blocking KC output during acquisition,  
478 providing a framework for postsynaptic plasticity that is induced and expressed through  
479 distinct nAChR subunits (Fig. 2-8).

480 Our study hints towards different pre- and postsynaptic storage of aversive and  
481 appetitive memories. It also argues against the assumption that appetitive and  
482 aversive memories will necessarily use the same molecular machinery to store  
483 information. Findings in the past, predominantly based on investigating aversive  
484 memories, have been generalized to learning per se. Indeed, postsynaptic  
485 contributions have been ruled out for a synaptic junction required for storage of  
486 aversive but not appetitive memories, which is fully consistent with our findings<sup>22</sup>.  
487 Interestingly, arguing for a division of appetitive and aversive storage sites,  
488 subpopulations of KCs have been implicated in aversive and appetitive memory  
489 respectively<sup>48</sup>. Lastly, we do not wish to exclude a potential involvement of  
490 postsynaptic plasticity in aversive memory formation per se. Indeed, it is conceivable  
491 that aversive memories also could have an appetitive component (release from  
492 punishment). However, our experiments suggest that these influences are not as  
493 crucial as for appetitive memories, at least in the context of single trial differential  
494 associative learning.

495

#### 496 ***Lasting postsynaptic plasticity***

497

498 Recent anatomical studies<sup>23,44</sup> have reported both dopaminergic innervation of  
499 presynaptic KC compartments as well as somewhat unexpectedly direct synapses  
500 between presynaptic dopaminergic terminals and MBONs. We devised an experiment  
501 where we substituted KC input to the postsynaptic MBON compartment through  
502 artificial acetylcholine injection, while rendering dopaminergic neurons switchable  
503 through optogenetics. A protocol that trained and subsequently tested the synaptic  
504 junction between KCs and MBONs, demonstrates that plasticity (represented by a  
505 change in calcium responses to acetylcholine injection) was inducible by pairing  
506 dopaminergic with postsynaptic MBON activation that lasted beyond the training stage  
507 and was observable by mere ‘recall-like’ activation of the system (Fig. 3).  
508 Our experiments uncovered the ability to potentiate after pairing M6 MBON activation  
509 and stimulating a broad population of dopaminergic neurons that convey information  
510 on sugar, water or the relative valence of aversive stimuli<sup>5</sup>, while we find postsynaptic  
511 plasticity to be required for appetitive memory performance (Fig. 3). Previous studies  
512 looking into ‘natural’ appetitive sugar conditioning uncovered a relative depression in  
513 M4 (another MBON of the M4/6 cluster) dendrites, when comparing the responses of  
514 the paired (CS+) and unpaired odor (CS-) one hour after appetitive conditioning<sup>5,7,13</sup>.  
515 Moreover, we here show that *in vivo* appetitive absolute training depresses  
516 subsequent responses to the trained odor (Fig 5).  
517 However, we here (Fig. 3), for our *in vitro* experiments, perform global activation of the  
518 postsynaptic compartment and not the natural typical coverage of 5 % of input  
519 synapses per odor<sup>49</sup> (that allow for differential conditioning). Induced changes are  
520 therefore likely not comparable to the natural settings, where sparse sets of KCs and  
521 dopaminergic neurons are active within a tight temporal window. Moreover, we here  
522 abolish network contributions by suppressing active signal propagation to be able to  
523 concentrate on synaptic mechanisms during plasticity induction. Thus, our artificial  
524 training (Fig. 3) through global dendritic activation likely does not mirror precise  
525 physiological conditions allowing for plasticity of a sparse set of synapses to convey  
526 odor-specificity to a memory, and should therefore only be viewed as a proof of  
527 principle for postsynaptic plasticity induction per se. That said, similar protocols<sup>50</sup> that  
528 involved broad activation of KCs (and thus did not circumvent the presynaptic  
529 compartment) have demonstrated comparable plasticity induction at this synapse.  
530 However, our data also demonstrate that depression and potentiation (or suppression  
531 of depression, see odor only presentation and absolute conditioning in Fig. 5) can  
532 occur at the postsynaptic compartment, with  $\alpha 2$  apparently involved in both (Fig. 3 and  
533 5).

534 Local acetylcholine application to the MB can also activate calcium transients in  
535 dopaminergic presynaptic terminals<sup>51</sup>. Therefore, our protocol could in principle include  
536 some dopaminergic contributions already at baseline level. However, we show that  
537 knock-down of  $\alpha 2$  at the level of M4/6 abolishes the observed potentiation and control  
538 experiments using the paired training protocol in the absence of CsChrimson  
539 expression in dopaminergic neurons do not show any signs of plasticity (Fig. 3 and  
540 Supplementary Fig. 3). Moreover, it has been shown that, to actually release dopamine  
541 from the presynaptic terminal, a coincident signal via carbon monoxide is required<sup>52,53</sup>.  
542 Therefore, an unwanted activation of dopaminergic neurons in our experiments is  
543 unlikely.

544 It should also be noted that M4, which shows depression, and M6 have common but  
545 also distinct physiological roles, for instance during aversive memory extinction<sup>13</sup>.  
546 Besides that, different temporal requirements for M4 and M6 memory expression have  
547 been reported<sup>11</sup>. It is therefore possible that physiological changes in the context of  
548 appetitive learning led to different plasticity profiles in M4 and M6 neurons respectively,  
549 or that initial potentiation over time can be reverted to depression. As noted above,  
550 MBON drive is bidirectionally modifiable and has the propensity to both potentiate and  
551 depress<sup>17</sup>.

552

### 553 ***Nicotinic receptors follow temporal sequence***

554

555 Lasting plasticity traces as observed here (Fig. 3) appear to fit the core criteria for long-  
556 term potentiation of vertebrate postsynapses<sup>3,54</sup>. Plasticity can be divided into an  
557 induction period mediated via NMDA receptors and a subsequent expression period  
558 that requires altered AMPA receptor dynamics<sup>3</sup>. Here, we identify the nicotinic  $\alpha 5$   
559 subunit as required both for the induction and the expression of appetitive memories  
560 at *Drosophila* MBONs (Fig. 2).  $\alpha 5$  nAChR subunits that can form homomeric  
561 channels<sup>3839</sup> could take on a similar role to NMDARs.  $\alpha 5$  would gate the potentiation  
562 or depression of synaptic strength influencing the incorporation or exchange of  
563 additional receptor subunits or complexes. In line with this, we show that knock-down  
564 of  $\alpha 5$  subunits interferes with familiarity learning in the  $\alpha 3$  compartment of the MBs:  
565 flies no longer form familiarity memories, they react to a novel odor the same way as  
566 to a familiar one, 'as if they had learned that this new odor was familiar before' (Fig. 7,  
567 8). Moreover, we do not observe  $\alpha 5$  subunit dynamics (Fig. 7), whereas knock-down  
568 of  $\alpha 5$  leads to decreased levels of  $\alpha 2$  subunits (Fig. 4), and  $\alpha 2$  dynamics are no longer  
569 observable when knocking-down  $\alpha 5$  in the MBONs of the  $\alpha 3$  compartment (Fig 7).



570 Thus, we can draw compelling analogies to glutamatergic systems governing plasticity  
571 in vertebrates. Whether even more core criteria are met for the comparison of  
572 invertebrate and vertebrate plasticity systems, further depends on whether the here  
573 observed receptor dynamics will actually translate to exo-/endocytosis of postsynaptic  
574 receptors or lateral diffusion of receptor subunits along the MBON dendrites. Our  
575 established system should provide the means to investigate this further in the future.  
576 Interestingly, high levels of dendritic activation after  $\alpha 5$  knock-down are translated to  
577 reduced axonal calcium transients<sup>4</sup>, effectively leading to decreased signal  
578 transduction within the MBON. Of note, MBONs do not appear to exhibit prominent  
579 spines on their dendrites<sup>23</sup>. Therefore, increased dendritic activation could lead to a  
580 change in membrane resistance and result in synaptic interference.

581

### 582 ***$\alpha 2$ subunit-positive receptors mediate memory expression***

583

584 We also find that later forms of appetitive memory expression require both the  $\alpha 2$  and  
585  $\alpha 1$  receptor subunits (Fig. 2). A recent study<sup>37</sup> has demonstrated that, when expressed  
586 heterologously, these subunits can co-assemble to form heterodimers with  $\beta$  subunits,  
587 which, depending on the precise composition of these channels, can harbor different  
588 properties, potentially reminiscent to AMPAR<sup>55</sup>. However, MB distribution profiles of  $\alpha 1$   
589 and  $\alpha 2$  subunits do not match completely, for instance at the level of the  $\gamma 5$  or  $\alpha '2$   
590 compartments (Fig. 4), indicating that they could also partake in different or  
591 independent receptor configurations. It should be worthwhile to compare receptor  
592 localization with single cell sequencing results<sup>8</sup>.

593 Importantly,  $\alpha 2$  subunit knock-down at M4/6 MBONs does not affect immediate  
594 appetitive memories, but later stages of memory (Fig. 2). We show in a complex  
595 neuropile, that *in vivo*, on a time scale of 10 to 20 minutes after learning, exposure to  
596 odor induces changed  $\alpha 2$  receptor subunit dynamics that are suppressed by  
597 simultaneous dopamine exposure ('learning', Fig. 6). Therefore, changes in  $\alpha 2$   
598 dynamics, potentially reminiscent to AMPAR, can be attributed to memory expression  
599 and consolidation that takes place in an early phase following training (the first 20  
600 minutes) but will establish longer-term memories (3 hours). It should be noted, that  
601 whether dopamine pairing would also lead to a reduction of  $\alpha 2$  levels over time,  
602 potentially explaining synaptic depression, cannot be assessed with our experimental  
603 settings at this time, but would appear as a valid possibility.

604 We show that familiarity learning can take place when knocking down  $\alpha 2$  nAChR  
605 subunits in  $\alpha '3$  MBONs in principle (Fig. 8), however, at clearly decreased efficacy and

606 only after several trials. We speculate that the observation of memories still expressed  
607 *per se* in this context, could be explained by redundancies with  $\alpha 1$  or other subunits  
608 (but see heterogeneous localization and enrichment in different MB compartments,  
609 Fig. 4). Redundancies could also explain why we partially observe functional  
610 phenotypes after knock-down of individual subunits, but only moderate structural  
611 changes. We also want to point out that subunits we did not identify as absolutely  
612 required for memory expression (Fig. 2) in this study could nonetheless partake in  
613 distinct phases of plasticity processes.

#### 614 ***$\alpha 2$ dynamics as general plasticity mode***

615

616 In the context of both familiarity learning and appetitive conditioning, odor exposure  
617 induces increased  $\alpha 2$  subunit dynamics (Fig. 6, 7) accompanying postsynaptic  
618 depression<sup>7,15</sup> (Fig. 7), while not or mildly affecting  $\alpha 5$  subunits. Therefore, the same  
619 basic mechanisms, odor-induced  $\alpha 2$  receptor dynamics, seem to express two opposed  
620 plastic outcomes in the context of associative and non-associative memories and  
621 contribute to different learning rules across MB compartments<sup>22,56</sup>. We speculate that  
622  $\alpha 2$  dynamics induced by odor in the M4/6 dendrites could be reminiscent of dark  
623 currents in the vertebrate visual system<sup>57</sup> allowing for rapid adaptation with low levels  
624 of synaptic noise. Receptor exchange at the level of M4/6 dendrites would actually  
625 take place when no associations are formed and stalled when dopaminergic neurons  
626 (triggered by sugar) are simultaneously active with KCs (triggered by odor). Indeed,  
627 repeated OCT stimulation led to a facilitation of calcium transients (potentially  
628 corresponding to an increase of receptor incorporation, Fig.5-6)), while depression (in  
629 this case likely to be mediated by removal of receptors, but see above) is triggered by  
630 paired training (Fig. 6). In contrast, at the level of the  $\alpha '3$  compartments, odor activates  
631 both MBONs and dopaminergic neurons. Here, the plasticity rule would be reversed.  
632 Synaptic depression is accompanied by actively changing the receptor composite. We  
633 speculate that such plasticity could function reminiscent of mechanisms observed for  
634 climbing fiber-induced depression of parallel fiber to Purkinje cell synapses<sup>58</sup>.

635

636 However, whether increased dynamics can be translated to more incorporation or  
637 removal of  $\alpha 2$ -type receptors, or depending on the plasticity rule both, will require high  
638 resolution imaging experiments in the future.

639

640 Similar to AMPAR, localization of  $\alpha 2$ , but not  $\alpha 5$  subunits, depends on Dlg, the  
641 orthologue to vertebrate PSD-95 and PSD-93. Interestingly, the latter has been

642 implicated in structural integrity of cholinergic nicotinic receptor arrangements<sup>59</sup> in  
643 vertebrates.

644

### 645 ***Are cholinergic and glutamatergic synapses interchangeable?***

646

647 Our study fuels the question of how unique properties of individual neurotransmitter  
648 systems at synapses are. While dopamine signaling is remarkably conserved between  
649 invertebrates and vertebrates, cholinergic and glutamatergic systems appear, now  
650 more than before (this study), somewhat interchangeable. While vertebrates (but also  
651 evolutionarily distant *C. elegans*) for instance use acetylcholine at the neuromuscular  
652 junction and store memories predominantly at glutamatergic synapses, it is the other  
653 way around in *Drosophila* and other invertebrates, such as *Sepia*<sup>4–6,60,61</sup>. Now we show  
654 that, at cholinergic synapses,  $\alpha 5$  and  $\alpha 2$  subunits behave in a potentially comparable  
655 way to NMDARs and AMPARs at glutamatergic synapses during a postsynaptic  
656 plasticity sequence underlying memory storage. In this context, we offer several lines  
657 of evidence that invertebrates utilize postsynaptic plasticity during memory storage and  
658 not as previously assumed rely on presynaptic mechanisms only.

659

660 We therefore propose that, across phyla, postsynaptic plasticity, with the propensity to  
661 store memories and adapt network function plastically, can take place regardless of  
662 neurotransmitter identity.

663

### 664 ***A molecular plasticity sequence***

665

666 Together, we propose a model (Fig. 9) in which  $\alpha 5$ -subunit containing receptors  
667 mediate the early phase of postsynaptic memory storage, potentially by leading to  
668 elevated postsynaptic calcium flux. Concurrent events see changed dynamics of the  
669  $\alpha 2$  receptor that are regulated by Dlg. Nicotinic receptor subunits hereby likely will  
670 interact with adaptor proteins to bind to Dlg, reminiscent to what is known for AMPAR<sup>35</sup>.  
671 Importantly, we identify elevated  $\alpha 2$  subunit dynamics in the context of associative and  
672 non-associative memory expression. Increased  $\alpha 2$  subunit dynamics in both cases are  
673 triggered by odor application. At the level of M4/6, suppressed dynamics would  
674 correspond to synaptic depression, while at the level of  $\alpha '3$  MBONs increased  
675 dynamics result in postsynaptic depression. Therefore, different learning rules likely  
676 govern the incorporation or exchange or mobilization of receptors in or out of synapses.  
677 The precise molecular mechanisms underlying these plasticity rules will need to be

678 addressed in the future. However,  $\alpha 2$  subunits could potentially be exchanged for a  
679 receptor complex with higher calcium permeability.

680

681 Our findings are consistent with the current mushroom body skew model<sup>5</sup>, where the  
682 summed MBON output will determine an animal's choice. However, we add an  
683 additional layer, already at the MBON input site. Changes do not happen, as previously  
684 believed, at the presynaptic compartment only, but potentially at both synaptic  
685 compartments. Thus, the power to store (potentially conflicting) information separately  
686 at either the pre- or postsynaptic site, equips the system with additional flexibility. How  
687 precisely pre- to postsynaptic and post- to presynaptic signaling is regulated will need  
688 to be addressed in the future, but will likely involve transsynaptic signaling routes<sup>61</sup>.  
689 Importantly, the identified modes of postsynaptic plasticity will open avenues for  
690 investigations looking into pre- versus postsynaptic contributions during reversal  
691 learning, reconsolidation and extinction learning<sup>13,33</sup>.

692

## 693 **Methods**

694

### *Fly genetics*

695 Flies were raised on standard food under standard laboratory conditions unless stated  
696 otherwise (25°C, 65 %, 12-hour light-dark cycle)<sup>7,40</sup>. Driver lines used were MB011B  
697 (Split-Gal4)<sup>10</sup>, MB112C<sup>10</sup> (Split-Gal4), MB461B<sup>10</sup> (Split-Gal4), MB027B<sup>15</sup> (Split-Gal4),  
698 R13F02-Gal4<sup>10</sup>, OK107-Gal4<sup>4</sup>, VT1211-GAL4<sup>7</sup>, and R58E02-LexA<sup>26</sup>. We used the  
699 following UAS-nAChR<sup>RNAi</sup> flies<sup>4,51</sup>: Bloomington stock numbers 28688, 27493, 27671,  
700 31985, 25943, 27251 and 25835. Additionally, we used<sup>41,42</sup> Dlg<sup>S97</sup>-RNAi as well as  
701 UAS-Dlg<sup>GFP</sup>, UAS-Gal80<sup>ts</sup> 48, UAS-Shi<sup>ts1</sup> 48, 247-dsRed<sup>7</sup>, LexAop-CsChrimson and  
702 UAS-GCamp6f<sup>4,13,26</sup>, UAS-SynaptoPhluorin<sup>62</sup>. Gal80<sup>ts</sup> flies were raised at 18-20°C and  
703 were placed at 32°C 3-5 days before the experiment. Note that complex genotypes did  
704 not always permit usage of MB011B for genetical access to M4/6 neurons throughout  
705 the manuscript. In that case, in order to reduce genetic complexity, we used VT1211-  
706 Gal4.

707

### *Behavior*

708

#### *T-maze memory*

709 3- to 9-day old mixed-sex populations were trained and tested together as previously  
710 described<sup>7</sup>. Odors used were 3-Octanol (OCT, Aldrich) and 4-Methylcyclohexanol  
711 (MCH, Aldrich) diluted in mineral oil (approximately 1:100 for aversive, 1:1000 for  
712 appetitive memory, absolute concentrations were minimally adjusted to prevent odor  
713 bias). For aversive protocols, flies were exposed to the CS+ for 1 minute with 12 1.5  
714 seconds long 120 V electric shocks (interstimulus interval: 3.5 seconds) followed by  
715 45 seconds of air, 1 minute of CS- exposure and another 30 seconds of air. Flies were  
716 given 2 minutes to choose between the CS+ and CS- in a T-Maze during retrieval in  
717 the dark. For appetitive conditioning flies were starved for 20 - 24 hours before the  
718 experiment. Flies were exposed to the CS- for 2 minutes. After 30 seconds, flies were  
719 exposed to the CS+ paired with sugar for 2 minutes followed by another 30 seconds  
720 of air. Performance indices were calculated as described previously<sup>7</sup>. Time of retrieval  
721 is stated in the figures. For Shi<sup>ts</sup> experiments, flies were kept at 32°C 30 minutes prior  
722 to and during training and brought to room temperature directly afterwards. Room  
723 temperature was approximately 23°C. For Fig. 2 and Supplementary Fig. 2 behavioral  
724 data sets from separate experiments were pooled. Note that 'screening hit' data  
725 displayed in Fig. 2a,b and Supplementary Fig. 2a,b were replotted to allow for  
726 comparison of genotypes with the corresponding genetic controls in Supplementary  
727 Fig. 2i-m.

## 728 ***Familiarity learning***

729 Familiarity training was essentially performed as described before<sup>15</sup> with slight  
730 adjustments. Flies were covered in yellow dust (Reactive Yellow 86, Fisher Scientific)<sup>15</sup>  
731 and placed in a cylindrical custom designed chamber. To ensure a constant air stream  
732 we placed the chamber between an air and a vacuum pump (800ml/min). Air  
733 permeable cotton wool was used to close the open ends of the chamber. The air supply  
734 was either connected to pure mineral oil or MCH diluted in mineral oil at a concentration  
735 of 1:50. For switching between odor and mineral oil, a clamp was manually opened  
736 and closed. Video recording was performed at 26 frames per second. For recordings  
737 and analyses we used a custom written Python script (v3.6) in Anaconda Jupyter  
738 Notebook environment.

## 739 ***Imaging***

### 740 ***Confocal single photon imaging and receptor quantification***

741 *Fixed explant brain imaging.* Brains were dissected on ice, fixed in 4%  
742 paraformaldehyde (Sigma) for 20 minutes and placed in PBST (0.1% Triton) for 30  
743 minutes followed by washing with PBS for 20 minutes twice. Vectashield was used as  
744 mounting medium. Flies were 2 - 8 day-old females raised at room temperature.

745 *Recording endogenous fluorescence.* Imaging was performed using a confocal single  
746 photon inverse microscope (Leica SP5/STED) equipped with a 64x oil objective. Laser  
747 power and gain were adjusted between experiments, making normalization of the  
748 signals necessary. Values for the heatmap in Fig. 4 were normalized to the mean MB  
749 fluorescence value to ensure comparability. Voxel size was (height x width x depth)  
750 123 nm x 123 nm x 500 nm. ROIs were drawn manually in ImageJ using the 247-  
751 dsRed channel for orientation (for Fig 5B). Heat maps were created in Microsoft Excel.  
752 For quantifications following knock-down, the  $\gamma 5$  compartment was normalized to  $\gamma 4$   
753  $((\gamma 5 - \gamma 4) / \gamma 4)$ , and the  $\beta' 2$  to the  $\beta' 1$  compartment  $((\beta' 2 - \beta' 1) / \beta' 2)$  of the same animal.  
754 Each 'n' corresponds to one hemisphere.

#### 755 ***In vivo two photon imaging of receptor dynamics***

756 Fluorescence recovery after photobleaching (FRAP) experiments were performed *in*  
757 *vivo*. 2 - 8 day-old flies were anesthetized on ice and mounted in a custom-made  
758 chamber. The head capsule was opened under room temperature sugar-free HL3-like  
759 saline, and legs were immobilized with wax<sup>7</sup>. Sugar-free HL3-like saline containing 30  
760 units of Papain (Roche) was applied to the head capsule for 8 minutes to digest the  
761 brain's glial sheath and facilitate removal. Images were acquired using a multi photon  
762 microscope (Nikon) with a 25x water-immersion objective, controlled by Nikon NIS  
763 Elements software. Diluted odors (MCH or OCT in mineral oil 1:1000) were delivered  
764 on a clean air carrier stream using a 6-channel delivery system (CON electronics). The  
765 flies were subjected to experimental conditions including either no odor (air, *not shown*,  
766 no recovery detected), odor only, odor paired with local dopamine (10 mM) injection  
767 via a micropipette, or local dopamine injection only (see Fig. 6B and Supplementary  
768 Fig. S6 for experimental protocol schematics). Photobleaching was accomplished  
769 using focused, high intensity laser exposure for ~1 minute. Analysis of fluorescence  
770 recovery was performed using FIJI. ROIs were manually selected and recovery  
771 fluorescence was normalized to pre-bleaching baseline fluorescence and the percent  
772 recovery was calculated from the post-bleaching baseline fluorescence. Linear  
773 regression lines were fit to percent recovery plots in Graph Pad Prism and the mean  
774 slope of the linear regression lines was used to determine differences in overall  
775 fluorescence recovery for each condition.

776 ***In vivo confocal single photon imaging of receptor dynamics and calcium***  
777 ***transients***

778 3-4 days after eclosure, female flies were prepared as described above and imaged.  
779 Imaging was performed using a SP5 single-photon confocal microscope (Leica  
780 microsystems). Recording frame rate was 3 Hz. For bleaching high laser power was  
781 used focusing on the  $\alpha$ '3 compartments for 15-25 seconds. The baseline was recorded  
782 after bleaching, immediately before fixed inter-stimulus interval-training<sup>15</sup>. OCT was  
783 presented ten times for a second with a six second pause in between. Odor delivery  
784 (CON electronics) was controlled by the Leica acquisition software. After training, the  
785 same brain plane was recorded for 10 seconds with a pixel size of 200 nm in time  
786 intervals of 0, 5, 10, 15, 20, 30, 60 minutes after training. For control experiments air  
787 only was delivered to the chamber. Images of the same time interval recordings were  
788 averaged and processed in ImageJ. Gaussian blur ( $\sigma = 0.5$ ) was applied for smoothing  
789 and ROIs were selected manually.

790 ***In vivo two photon calcium imaging***

791 To measure odor responses, female 3 – 6-day old flies expressing UAS-GCaMP6f and  
792 UAS-RNAi to  $\alpha$ 2 or  $\alpha$ 5 at the level of M4/6 were tethered under the multiphoton  
793 microscope (Femtonics), essentially as described before<sup>7,63</sup>. 5 alternating 1 second  
794 OCT and MCH puffs were applied with 30 seconds in between each presentation.  
795 Fluorescent signals were recorded from dendrites in the  $\beta$ '2 MB compartment using  
796 MESc software (Femtonics) at a frame rate of roughly 31 Hz. ROIs incorporating the  
797 dendritic arbors were manually drawn. Data was processed using a Savitzky-Golay  
798 filter. Statistical analysis was performed using custom written Matlab scripts. For  
799 absolute training, following protocol was applied: after initial testing for odor responses,  
800 flies were exposed to odor puffs (MCH) twice with a 30-second gap between the  
801 applications. Corresponding odor responses were averaged. Training consisted of  
802 odor application while the fly fed on a sucrose droplet provided by a custom-made  
803 feeding arm<sup>64</sup>. After a two-minute break two odor puffs with a gap of 30 seconds were  
804 applied. Again, corresponding odor responses were averaged. AUCs were calculated  
805 using custom Matlab script and the first 4 seconds following odor onset were analyzed  
806 in order to cover entire responses. The AUCs pre- and post-training were normalized  
807 to the mean pre-training values of a group respectively. The averaged test responses  
808 pre-training were compared to the average post-training responses using a paired t-  
809 test or Wilcoxon matched-pairs signed rank test.

810 ***Explant brain widefield imaging, neurotransmitter application and optogenetics***

811 *Postsynaptic plasticity induction:* Brains of 3 - 10 day-old mixed sex flies were  
812 dissected on ice. Flies expressed CsChrimson<sup>tdTomato</sup> under control of R58E02-LexA  
813 and UAS-GCaMP6f under control of MB011B. The head capsule and sheath were  
814 removed in carbogenated solution (103 mM NaCl, 3 mM KCl, 5 mM N-Tris, 10 mM  
815 trehalose, 10 mM glucose, 7 mM sucrose, 26 mM NaHCO<sub>3</sub>, 1 mM NaH<sub>2</sub>PO<sub>4</sub>, 1.5 mM  
816 CaCl<sub>2</sub>, 4 mM MgCl<sub>2</sub>, 295 mOsm, pH 7.3) with forceps. The brain was subsequently  
817 perfused with carbogenated solution containing TTX (2 μM; 20 ml / 10 min flow speed)  
818 and imaged using an Olympus MX51WI wide field microscope with a 40x Olympus  
819 LUMPLFLN objective and an Andor iXON Ultra camera controlled by Solis software.  
820 An Olympus U25ND25 light filter was placed in the beam path to minimize baseline  
821 CsChrimson activation. A custom designed glass microcapillary was loaded with  
822 uncarbongenated solution containing 0.1 mM acetylcholine and maneuvered to the M6  
823 dendrites. The injection pressure of a P25-1-900 picospritzer was calibrated between  
824 3-8 psi. Each local acetylcholine application spanned 15 ms with a 4 s inter-injection  
825 interval.

826 Three pulses of acetylcholine followed by a 2-3 minute break were recorded after which  
827 the optogenetic response was assessed by applying 2 seconds red light pulses with  
828 an inter-red light-interval of 2 seconds (Supplementary Fig. S2). If no responses were  
829 visible by eye, the experiment was discarded. The first training protocol consisted of  
830 one training cycle per animal. 3 acetylcholine pulses were recorded followed by either  
831 5 acetylcholine injections, 5 red light pulses or both paired. For paired training both  
832 stimuli began simultaneously and the acetylcholine injection lasted for 15 ms (and gave  
833 rise to a calcium transients typically lasting > 1 seconds, please see example in Fig.  
834 3), while the paired red light pulse lasts for 2 seconds, allowing for maximal temporal  
835 overlap. This process was repeated 5x, with a 4 second break between trial. Following  
836 the training trial, 3 final acetylcholine test injections were applied. Final 5 flashes of red  
837 light were applied to assess tissue health following experiments, but were not further  
838 used for the analyses presented here. However, if no response was visible, the trial  
839 was discarded. For analysis, the first of the 3 acetylcholine injections was always  
840 discarded because of initial dilution of the capillary tip and the remaining 2 peak  
841 intensities were averaged.

842 All peaks within an experiment were quantified relative to the fluorescence baseline  
843 that we calculated for pre and post training acetylcholine responses. Baselines were  
844 set independently for each pre- and post-training recording using the polynomial



845 interpolation function in NOSA<sup>65</sup>. For investigating  $\alpha 2$  knock-down, only the paired  
846 condition was tested.

847 For controls not expressing CsChrimson, we used VT1211-Gal4 driving UAS-  
848 GCaMP6f, instead of MB011B, for technical reasons. This was combined with either  
849 expression of R58E02-LexA or UAS-CsChrimson<sup>tdTomato</sup>. Only paired training was  
850 investigated in this context.

851 For the second protocol shown in Supplementary Fig. S3a-e the training protocol  
852 consisted of three cycles per animal, with every cycle made up of different training  
853 regimens (Fig. 2c, d, Supplementary Fig. S2). The three different training protocols  
854 lead to a total of six permutations. Each training session started with 5 test  
855 acetylcholine injections with a subsequent 1 min rest period. The actual training  
856 consists of 10 times either acetylcholine injections, red light pulses, or a combination  
857 of both. Following the last training trial, 5 final acetylcholine test injections were applied.  
858 and 4 flashes of red light were applied to assess tissue health. Parameters for injection  
859 and optogenetic activation were as described above. For analysis, we always  
860 discarded the first of the five 5 acetylcholine injections because of initial dilution of the  
861 capillary tip. The remaining peak intensities were averaged. Data of the corresponding  
862 training paradigm were pooled and analyzed.

863 *Excitability of Kenyon cell axons:* To test whether KC axons were excited by focal  
864 acetylcholine injections at the level of M4/6 dendrite innervation, either UAS-  
865 synaptoPhluorin or UAS-GCaMP6f were expressed under the control of OK107-Gal4.  
866 Following the acetylcholine injection experiment, the capillary was exchanged with a  
867 capillary containing the same solution with additional 300-400 mM KCl, to evaluate  
868 tissue health (not shown for GCaMP6f imaging). To pick up potentially small changes,  
869 we increased the injection pressure to 8-14 Psi and the injection time to 150-225 ms  
870 (GCaMP6f, 8s inter-injection interval and 3 consecutive injections) and 300-525 ms  
871 (synaptoPhluorin, with an 8s inter-injection interval and 3 consecutive injections).

872 Images were analyzed using NOSA<sup>40,65</sup> and GraphPad Prism.

## 873 **Statistics**

874 Statistical analyses were performed as stated in the previous methods sections and  
875 figure legends. Data was always tested for normality using a Shapiro-Wilk test. If  
876 normally distributed data, were analyzed using ANOVA followed by post-hoc test or a

877 (paired) t-test. If not normal, we used a Kruskal Wallis followed by post-hoc test, or a  
878 Wilcoxon matched-pairs signed rank test.

## 879 **Tagged receptor subunits**

880 All subunits were tagged using CRISPR technology and motifs previously described<sup>66</sup>.  
881 Further details will be published separately and can be requested from the  
882 corresponding author.

## 883 **Acknowledgements**

884 We thank Anatoli Ender, Johannes Felsenberg, Davide Raccuglia, Lisa  
885 Scheunemann, Stephan Sigrist, Uli Thomas and Scott Waddell for comments on the  
886 manuscript, Stephan Sigrist and Uli Thomas for reagents, the Janelia and Vienna fly  
887 projects, and the Bloomington Stock Center and VDRC for fly lines, Daisuke Hattori  
888 and Yoshi Aso for help with the familiarity experiments. Multiphoton and single photon  
889 confocal imaging was partially performed using microscopes of the AMBIO and NWFZ  
890 core facilities of the Charité. **Funding:** Funded by the Deutsche  
891 Forschungsgemeinschaft (DFG, German Research Foundation) under Germany's  
892 Excellence Strategy – EXC-2049 – 390688087, the Emmy Noether Programme, TP  
893 A27 of SFB958 (184695641) and TP A07 of SFB1315 (327654276) to D.O. D.O. was  
894 further supported by FOR 2705 (365082554). **Author contribution:**  
895 Conceptualization, C.P., M-M.H., E.R., S.R., D.L., Y-C.C., D.O., Investigation, C.P., M-  
896 M.H., E.R. D.L., R.S.-G., C.R., S.R., Y-C.C., I.B., T.F; Resources, D.O.; Writing, D.O.,  
897 C.P.; Instrumentation: JR; Comments, M-M.H., E.R. D.L., R.S.-G., S.R., Y-C.C..

898

899 **Competing interests:** Authors declare no competing interests.

900

## 901 **Supplemental Information:**

902 Supplementary Figure 1: Permissive temperature controls accompanying Fig. 1.

903

904 Supplementary Figure 2. Genetic controls and alternate data display accompanying  
905 Fig. 2

906

907 Supplementary Figure 3. Control experiments for Fig. 3.

908

909 Supplementary Figure 4. Detailed distribution of  $\alpha$  subunits in the MB accompanying  
910 Fig. 4

911 Supplementary Figure 5. Additional data accompanying Fig. 5.

912

913 Supplementary Fig. 6. Receptor subunit recovery, accompanying Fig. 6.

914

915 Supplementary Fig. 7. Dlg<sup>GFP</sup> FRAP, accompanying Fig. 7

916

917 Supplementary Fig. 8. Additional Ethograms, accompanying Fig. 8.

918

## 919 **References**

920 1. Glanzman, D. L. Common Mechanisms of Synaptic Plasticity in Vertebrates and  
921 Invertebrates. *Curr Biol* 20, R31–R36 (2010).

922

923 2. Korte, M. & Schmitz, D. Cellular and System Biology of Memory: Timing, Molecules,  
924 and Beyond. *Physiol Rev* 96, 647–93 (2016).

925

926 3. Nicoll, R. A. A Brief History of Long-Term Potentiation. *Neuron* 93, 281–290 (2017).

927

928 4. Barnstedt, O. et al. Memory-Relevant Mushroom Body Output Synapses Are  
929 Cholinergic. *Neuron* 89, 1237–47 (2016).

930

931 5. Oswald, D. & Waddell, S. Olfactory learning skews mushroom body output pathways  
932 to steer behavioral choice in *Drosophila*. *Curr Opin Neurobiol* 35, 178–84 (2015).

933

934 6. Shomrat, T. et al. Alternative sites of synaptic plasticity in two homologous “fan-out  
935 fan-in” learning and memory networks. *Curr Biology Cb* 21, 1773–82 (2011).

936

937 7. Oswald, D. et al. Activity of Defined Mushroom Body Output Neurons Underlies  
938 Learned Olfactory Behavior in *Drosophila*. *Neuron* 86, 417–427 (2015).

939

940 8. Aso, Y. et al. Nitric oxide acts as a cotransmitter in a subset of dopaminergic neurons  
941 to diversify memory dynamics. *Elife* 8, e49257 (2019).

942

943 9. Aso, Y. et al. Mushroom body output neurons encode valence and guide memory-  
944 based action selection in *Drosophila*. *Elife* 3, e04580 (2014).

945

946 10. Aso, Y. et al. The neuronal architecture of the mushroom body provides a logic for  
947 associative learning. *Elife* 3, e04577 (2014).

948

949 11. Bouzaiane, E., Trannoy, S., Scheunemann, L., Plaçais, P.-Y. & Preat, T. Two  
950 independent mushroom body output circuits retrieve the six discrete components of  
951 *Drosophila* aversive memory. *Cell Reports* 11, 1280–92 (2015).

951

952 12. Cohn, R., Morante, I. & Ruta, V. Coordinated and Compartmentalized  
953 Neuromodulation Shapes Sensory Processing in *Drosophila*. *Cell* 163, 1742–55  
954 (2015).

955

956 13. Felsenberg, J. et al. Integration of Parallel Opposing Memories Underlies Memory  
957 Extinction. *Cell* 175, 709–722.e15 (2018).

958

959 14. Felsenberg, J., Barnstedt, O., Cognigni, P., Lin, S. & Waddell, S. Re-evaluation of  
960 learned information in *Drosophila*. *Nature* 544, 240–244 (2017).

- 961  
962 15. Hattori, D. et al. Representations of Novelty and Familiarity in a Mushroom Body  
963 Compartment. *Cell* 169, 956-969.e17 (2017).  
964  
965 16. Ichinose, T. et al. Reward signal in a recurrent circuit drives appetitive long-term  
966 memory formation. *Elife* 4, e10719 (2015).  
967  
968 17. Lewis, L. P. C. et al. A Higher Brain Circuit for Immediate Integration of Conflicting  
969 Sensory Information in *Drosophila*. *Curr Biology Cb* 25, 2203–14 (2015).  
970  
971 18. Pai, T.-P. et al. *Drosophila* ORB protein in two mushroom body output neurons is  
972 necessary for long-term memory formation. *P Natl Acad Sci Usa* 110, 7898–903  
973 (2013).  
974  
975 19. Perisse, E. et al. Aversive Learning and Appetitive Motivation Toggle Feed-  
976 Forward Inhibition in the *Drosophila* Mushroom Body. *Neuron* 90, 1086–99 (2016).  
977  
978 20. Séjourné, J. et al. Mushroom body efferent neurons responsible for aversive  
979 olfactory memory retrieval in *Drosophila*. *Nat Neurosci* 14, 903–10 (2011).  
980  
981 21. Plaçais, P.-Y., Trannoy, S., Friedrich, A. B., Tanimoto, H. & Preat, T. Two pairs of  
982 mushroom body efferent neurons are required for appetitive long-term memory  
983 retrieval in *Drosophila*. *Cell Reports* 5, 769–80 (2013).  
984  
985 22. Hige, T., Aso, Y., Modi, M. N., Rubin, G. M. & Turner, G. C. Heterosynaptic  
986 Plasticity Underlies Aversive Olfactory Learning in *Drosophila*. *Neuron* 88, 985–98  
987 (2015).  
988  
989 23. Takemura, S. et al. A connectome of a learning and memory center in the adult  
990 *Drosophila* brain. *Elife* 6, e26975 (2017).  
991  
992 24. Bilz, F., Geurten, B. R. H., Hancock, C. E., Widmann, A. & Fiala, A. Visualization  
993 of a Distributed Synaptic Memory Code in the *Drosophila* Brain. *Neuron* 106, 963-  
994 976.e4 (2020).  
995  
996 25. Boto, T., Louis, T., Jindachomthong, K., Jalink, K. & Tomchik, S. M. Dopaminergic  
997 modulation of cAMP drives nonlinear plasticity across the *Drosophila* mushroom body  
998 lobes. *Curr Biology Cb* 24, 822–31 (2014).  
999  
1000 26. Handler, A. et al. Distinct Dopamine Receptor Pathways Underlie the Temporal  
1001 Sensitivity of Associative Learning. *Cell* 178, 60-75.e19 (2019).  
1002 27. Ehmann, N., Oswald, D. & Kittel, R. J. *Drosophila* active zones: from molecules to  
1003 behaviour. *Neurosci Res* 127, 14–24 (2017).  
1004  
1005 28. Dubnau, J., Grady, L., Kitamoto, T. & Tully, T. Disruption of neurotransmission in  
1006 *Drosophila* mushroom body blocks retrieval but not acquisition of memory. *Nature* 411,  
1007 476–480 (2001).  
1008  
1009 29. Krashes, M. J., Keene, A. C., Leung, B., Armstrong, J. D. & Waddell, S. Sequential  
1010 Use of Mushroom Body Neuron Subsets during *Drosophila* Odor Memory Processing.  
1011 *Neuron* 53, 103–115 (2007).  
1012  
1013 30. McGuire, S. E., Le, P. T. & Davis, R. L. The Role of *Drosophila* Mushroom Body  
1014 Signaling in Olfactory Memory. *Science* 293, 1330–1333 (2001).  
1015

- 1016 31. Schwaerzel, M., Heisenberg, M. & Zars, T. Extinction Antagonizes Olfactory  
1017 Memory at the Subcellular Level. *Neuron* 35, 951–960 (2002).  
1018
- 1019 32. Kandel, E. R., Dudai, Y. & Mayford, M. R. The molecular and systems biology of  
1020 memory. *Cell* 157, 163–86 (2014).  
1021
- 1022 33. Lüscher, C. & Malenka, R. C. Drug-evoked synaptic plasticity in addiction: from  
1023 molecular changes to circuit remodeling. *Neuron* 69, 650–63 (2011).  
1024
- 1025 34. Won, S., Levy, J. M., Nicoll, R. A. & Roche, K. W. MAGUKs: multifaceted synaptic  
1026 organizers. *Curr Opin Neurobiol* 43, 94–101 (2017).  
1027
- 1028 35. Thompson, A. J., Lester, H. A. & Lummis, S. C. R. The structural basis of function  
1029 in Cys-loop receptors. *Q Rev Biophys* 43, 449–99 (2010).  
1030
- 1031 36. Dent, J. A. *Advances in Experimental Medicine and Biology*. *Adv Exp Med Biol*  
1032 683, 11–23 (2010).  
1033
- 1034 37. Ihara, M. et al. Cofactor-enabled functional expression of fruit fly, honeybee, and  
1035 bumblebee nicotinic receptors reveals picomolar neonicotinoid actions. *Proc National*  
1036 *Acad Sci* 117, 16283–16291 (2020).  
1037
- 1038 38. Lansdell, S. J., Collins, T., Goodchild, J. & Millar, N. S. The *Drosophila* nicotinic  
1039 acetylcholine receptor subunits  $\text{D}\alpha 5$  and  $\text{D}\alpha 7$  form functional homomeric and  
1040 heteromeric ion channels. *Bmc Neurosci* 13, 73 (2012).  
1041
- 1042 39. Eadaim, A., Hahm, E.-T., Justice, E. D. & Tsunoda, S. Cholinergic Synaptic  
1043 Homeostasis Is Tuned by an NFAT-Mediated  $\alpha 7$  nAChR-Kv4/Shal Coupled Regulatory  
1044 System. *Cell Reports* 32, 108119 (2020).  
1045
- 1046 40. Raccuglia, D. et al. Network-Specific Synchronization of Electrical Slow-Wave  
1047 Oscillations Regulates Sleep Drive in *Drosophila*. *Curr Biology Cb* 29, 3611-3621.e3  
1048 (2019).  
1049
- 1050 41. Bachmann, A. et al. Cell type-specific recruitment of *Drosophila* Lin-7 to distinct  
1051 MAGUK-based protein complexes defines novel roles for Sdt and Dlg-S97. *J Cell Sci*  
1052 117, 1899–1909 (2004).  
1053
- 1054 42. Soukup, S.-F., Pocha, S. M., Yuan, M. & Knust, E. DLin-7 Is Required in  
1055 Postsynaptic Lamina Neurons to Prevent Light-Induced Photoreceptor Degeneration  
1056 in *Drosophila*. *Curr Biol* 23, 1349–1354 (2013).  
1057
- 1058 43. Crittenden, J. R., Skoulakis, E. M., Han, K. A., Kalderon, D. & Davis, R. L. Tripartite  
1059 mushroom body architecture revealed by antigenic markers. *Learn Mem Cold Spring*  
1060 *Harb N Y* 5, 38–51 (1998).  
1061
- 1062 44. Eichler, K. et al. The complete connectome of a learning and memory centre in an  
1063 insect brain. *Nature* 548, 175–182 (2017).  
1064
- 1065 45. Stuart, G. J. & Spruston, N. Dendritic integration: 60 years of progress. *Nat*  
1066 *Neurosci* 18, 1713–1721 (2015).  
1067
- 1068 46. Tully, T., Preat, T., Boynton, S. C. & Vecchio, M. D. Genetic dissection of  
1069 consolidated memory in *Drosophila*. *Cell* 79, 35–47 (1994).

- 1070 47. Trannoy, S., Redt-Clouet, C., Dura, J.-M. & Preat, T. Parallel Processing of  
1071 Appetitive Short- and Long-Term Memories In *Drosophila*. *Curr Biol* 21, 1647–1653  
1072 (2011).  
1073
- 1074 48. Perisse, E. et al. Different kenyon cell populations drive learned approach and  
1075 avoidance in *Drosophila*. *Neuron* 79, 945–56 (2013).  
1076
- 1077 49. Honegger, K. S., Campbell, R. A. A. & Turner, G. C. Cellular-resolution population  
1078 imaging reveals robust sparse coding in the *Drosophila* mushroom body. *J Neurosci*  
1079 *Official J Soc Neurosci* 31, 11772–85 (2011).  
1080
- 1081 50. Zhao, X., Lenek, D., Dag, U., Dickson, B. & Keleman, K. Persistent activity in a  
1082 recurrent circuit underlies courtship memory in *Drosophila*. *Elife* 7, e31425 (2018).  
1083
- 1084 51. Cervantes-Sandoval, I., Phan, A., Chakraborty, M. & Davis, R. L. Reciprocal  
1085 synapses between mushroom body and dopamine neurons form a positive feedback  
1086 loop required for learning. *Elife* 6, e23789 (2017).  
1087
- 1088 52. Ueno, K. et al. Carbon Monoxide, a Retrograde Messenger Generated in  
1089 Postsynaptic Mushroom Body Neurons, Evokes Noncanonical Dopamine Release. *J*  
1090 *Neurosci Official J Soc Neurosci* 40, 3533–3548 (2020).  
1091
- 1092 53. Ueno, K. et al. Coincident postsynaptic activity gates presynaptic dopamine  
1093 release to induce plasticity in *Drosophila* mushroom bodies. *Elife* 6, e21076 (2017).  
1094
- 1095 54. Bliss, T. V. & Lomo, T. Long-lasting potentiation of synaptic transmission in the  
1096 dentate area of the anaesthetized rabbit following stimulation of the perforant path. *J*  
1097 *Physiology* 232, 331–56 (1973).  
1098
- 1099 55. Greger, I. H., Watson, J. F. & Cull-Candy, S. G. Structural and Functional  
1100 Architecture of AMPA-Type Glutamate Receptors and Their Auxiliary Proteins. *Neuron*  
1101 94, 713–730 (2017).  
1102
- 1103 56. Aso, Y. & Rubin, G. M. Dopaminergic neurons write and update memories with  
1104 cell-type-specific rules. *Elife* 5, e16135 (2016).  
1105
- 1106 57. Hagins, W. A., Penn, R. D. & Yoshikami, S. Dark Current and Photocurrent in  
1107 Retinal Rods. *Biophys J* 10, 380–412 (1970).  
1108
- 1109 58. Ito, M. Cerebellar Long-Term Depression: Characterization, Signal Transduction,  
1110 and Functional Roles. *Physiol Rev* 81, 1143–1195 (2001).  
1111
- 1112 59. Neff, R. A., Gomez-Varela, D., Fernandes, C. C. & Berg, D. K. Postsynaptic  
1113 scaffolds for nicotinic receptors on neurons. *Acta Pharmacol Sin* 30, 694–701 (2009).  
1114
- 1115 60. Ackermann, F., Waites, C. L. & Garner, C. C. Presynaptic active zones in  
1116 invertebrates and vertebrates. *Embo Rep* 16, 923–38 (2015).  
1117
- 1118 61. Oswald, D. & Sigrist, S. J. Assembling the presynaptic active zone. *Curr Opin*  
1119 *Neurobiol* 19, 311–8 (2009).  
1120
- 1121 62. Lin, A. C., Bygrave, A. M., Calignon, A. de, Lee, T. & Miesenböck, G. Sparse,  
1122 decorrelated odor coding in the mushroom body enhances learned odor discrimination.  
1123 *Nat Neurosci* 17, 559–568 (2014).

- 1124 63. Böhme, M. A. et al. Rapid active zone remodeling consolidates presynaptic  
1125 potentiation. *Nat Commun* 10, 1085 (2019).  
1126  
1127 64. Lin, S. et al. Neural correlates of water reward in thirsty *Drosophila*. *Nat Neurosci*  
1128 17, 1536–1542 (2014).  
1129  
1130 65. Oltmanns, S. et al. NOSA, an Analytical Toolbox for Multicellular Optical  
1131 Electrophysiology. *Front Neurosci-switz* 14, 712 (2020).  
1132  
1133 66. Raghu, S. V., Joesch, M., Sigrist, S. J., Borst, A. & Reiff, D. F. Synaptic  
1134 Organization of Lobula Plate Tangential Cells in *Drosophila*: D $\alpha$ 7 Cholinergic  
1135 Receptors. *J Neurogenet* 23, 200–209 (2009).  
1136

1137 **Figures**

1138 **Figure 1**

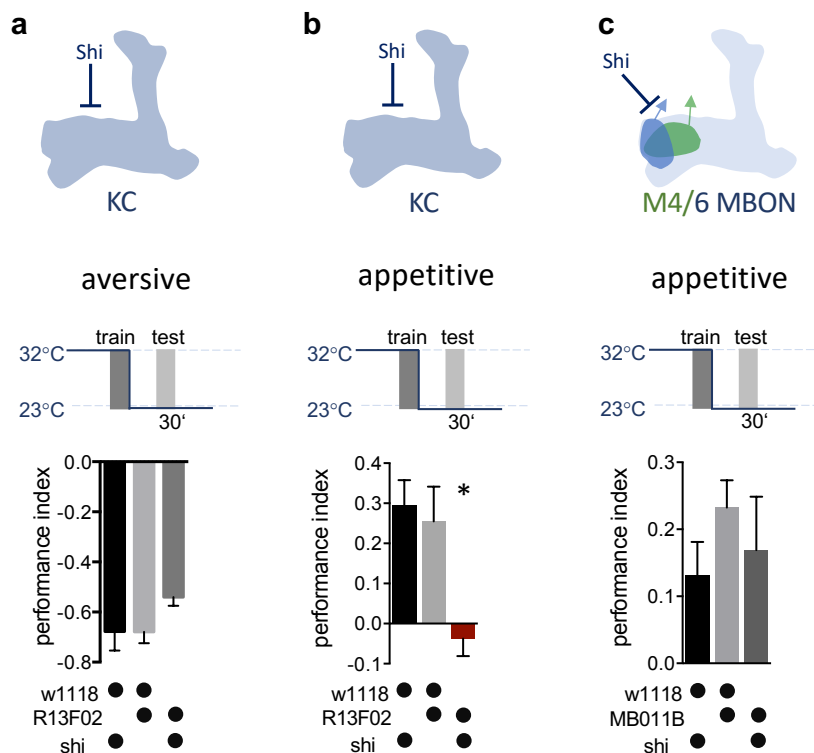

1139

1140 **Figure 1: KC neurotransmitter release is required for the acquisition of appetitive**  
1141 **memories.**

1142 **a-c)** Flies expressing temperature-sensitive Shibire (Shi) within KCs or MBONs are trained at  
1143 restrictive temperatures (32°C), and subsequently placed at permissive temperature (23°C)  
1144 throughout the consolidation and retrieval phase. Memory performance was tested 30 minutes  
1145 after training at permissive temperature. Shi blocks neurotransmitter release at 32°C.

1146 **a)** Block of neurotransmitter release from KCs (driver line R13F02-Gal4) during training  
1147 does not impact 30 min aversive memory performance. Bar graphs: mean ± SEM; n = 7 – 8;  
1148 one-way ANOVA followed by Tukey's test ( $p > 0.05$ ).

1149 **b)** Block of neurotransmitter release from KCs (driver line R13F02-Gal4) during training  
1150 impairs 30 min appetitive memory performance. Bar graphs: mean ± SEM; n = 10 – 16; Kruskal-  
1151 Wallis followed by Dunn's test ( $p < 0.05$ ), \* =  $p < 0.05$ .

1152 **c)** Block of neurotransmitter release from M4/6 MBONs (driver line MB011B) during  
1153 training does not impact 30 min appetitive memory performance. Bar graphs: mean ± SEM; n  
1154 = 14 – 24; one-way ANOVA followed by Tukey's test ( $p > 0.05$ ).

1155 See Supplementary Fig. S1 for further information.

1156

1157



1158 **Figure 2**

1159

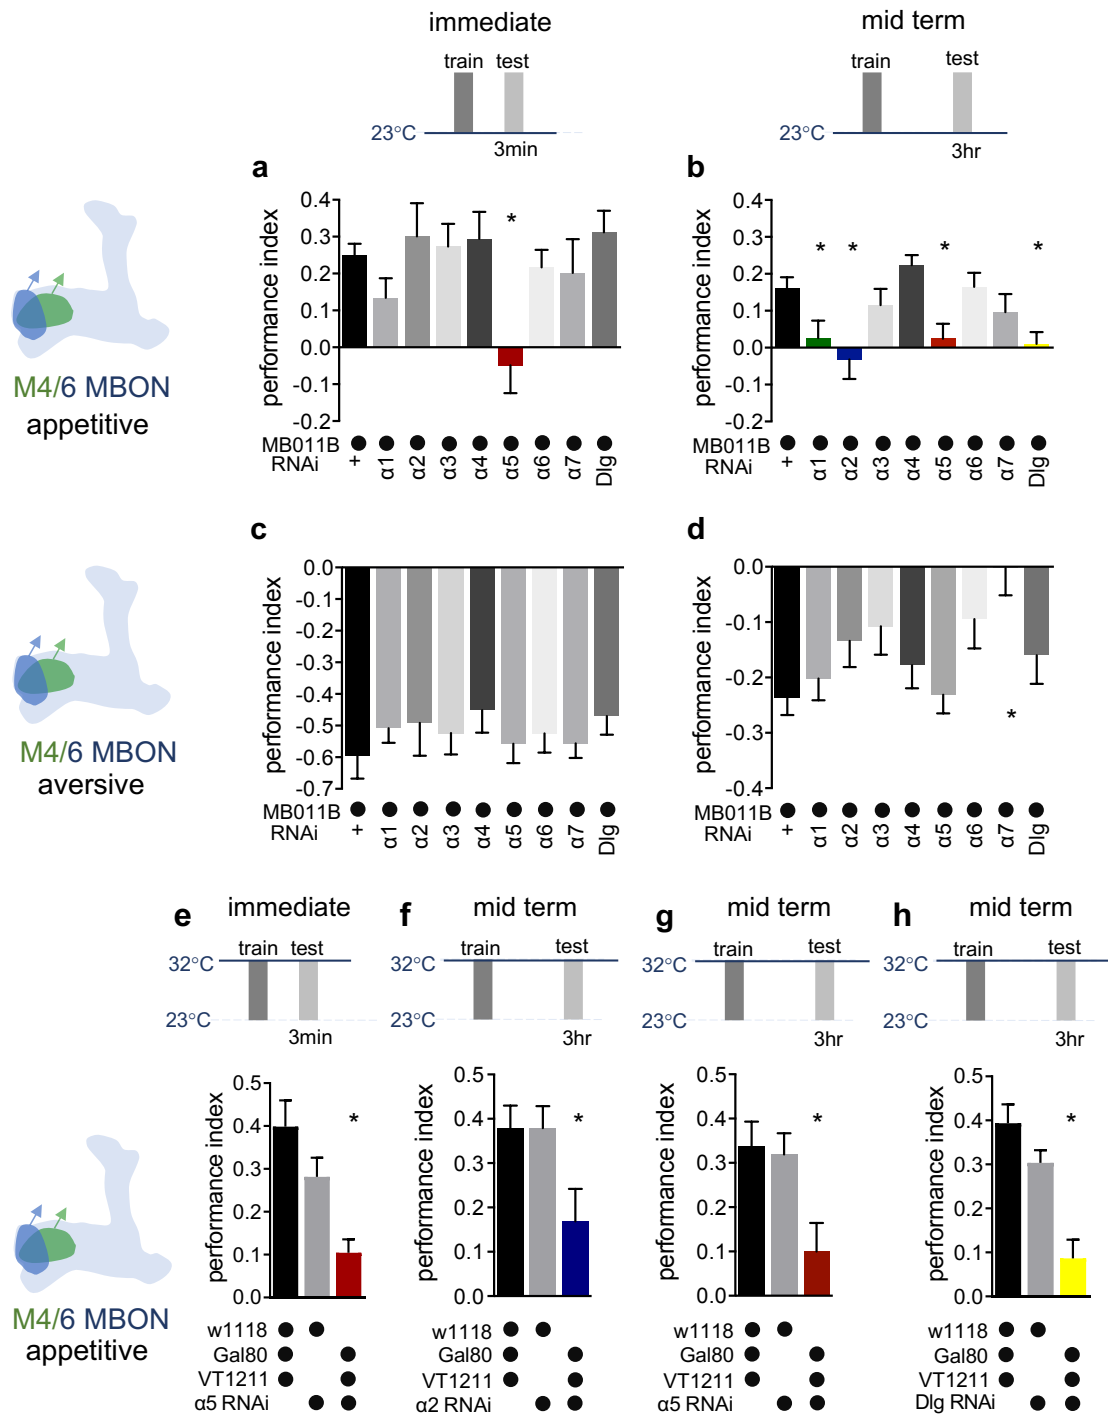

1160

1161 **Figure 2: Specific nAChR  $\alpha$  subunits are needed for specific memories in M4/6 neurons.**

1162 **a)** Immediate appetitive memories are impaired following RNAi knock-down of the  $\alpha 5$   
 1163 nAChR subunit in M4/6 MBONs (driver line MB011B). Bar graphs: mean  $\pm$  SEM; n = 8 – 13, for  
 1164 controls: n = 20; one-way ANOVA followed by Dunnett's test ( $p < 0.05$ ), \* =  $p < 0.05$ .

1165 Note: data depicted correspond to initial screen, please see Fig. S2 for alternate display  
1166 including all genetic controls.

1167 **b)** RNAi knock-down of the  $\alpha 1$ ,  $\alpha 2$ ,  $\alpha 5$  nAChR subunits or Dlg in M4/6 MBONs (driver line  
1168 MB011B) impair 3-hour appetitive memories. Bar graphs: mean  $\pm$  SEM; n = 12 – 26, for  
1169 controls: n = 38; Kruskal-Wallis followed by Dunn's test ( $p < 0.05$ ), \* =  $p < 0.05$ .

1170 Note: data depicted correspond to initial screen, please see Fig. S2 for alternate display  
1171 including all genetic controls.

1172 **c)** Immediate aversive learning is not impaired by RNAi knock-down of any subunit in  
1173 M4/6 MBONs (driver line MB011B). Bar graphs: mean  $\pm$  SEM; n = 6 – 8, for controls: n = 12;  
1174 Kruskal-Wallis followed by Dunn's test ( $p > 0.05$ ).

1175 **d)** 3-hour aversive memory is not affected by knock-down of  $\alpha$  subunits with the exception  
1176 of  $\alpha 7$  (driver line MB011B). Bar graphs: mean  $\pm$  SEM; n = 21 – 32, for controls: n = 61. Kruskal-  
1177 Wallis followed by Dunn's test ( $p < 0.05$ ), \* =  $p < 0.05$ .

1178 **e)** RNAi knock-down of the  $\alpha 5$  subunit in M4/6 MBONs (driver line VT1211-Gal4) is  
1179 suppressed during development using Gal80<sup>ts</sup>. 3-5 days before the experiment RNAi knock-  
1180 down was induced. Immediate memory is significantly impaired. Bar graphs: mean  $\pm$  SEM;  
1181 n = 6 – 7; one-way ANOVA followed by Tukey's test ( $p < 0.05$ ), \* =  $p < 0.05$ .

1182 **f)** RNAi knock-down of the  $\alpha 2$  subunit in M4/6 MBONs (driver line VT1211-Gal4) is  
1183 suppressed during development using Gal80<sup>ts</sup>. 3-5 days before the experiment RNAi knock-  
1184 down was induced. 3-hour memories are significantly impaired. Bar graphs: mean  $\pm$  SEM; n =  
1185 16 – 17; one-way ANOVA followed by Tukey's test ( $p < 0.05$ ), \* =  $p < 0.05$ .

1186 **g)** RNAi knock-down of the  $\alpha 5$  subunit in M4/6 MBONs (driver line VT1211-Gal4) is  
1187 suppressed during development using Gal80<sup>ts</sup>. 3-5 days before the experiment RNAi knock-  
1188 down was induced. 3-hour memories are significantly impaired. Bar graphs: mean  $\pm$  SEM; n =  
1189 25 – 27; one-way ANOVA followed by Tukey's test ( $p < 0.05$ ), \* =  $p < 0.05$ .

1190 **h)** RNAi knock-down of the Dlg in M4/6 MBONs (driver line VT1211-Gal4) is suppressed  
1191 during development using Gal80<sup>ts</sup>. 3-5 days before the experiment RNAi knock-down was  
1192 induced. 3-hour memories are significantly impaired. Bar graphs: mean  $\pm$  SEM; n = 8 – 11; one-  
1193 way ANOVA followed by Tukey's test ( $p < 0.05$ ), \* =  $p < 0.05$ .

1194 Also see Supplementary Fig. S2 for further information.

1195

1196

1197 **Figure 3**

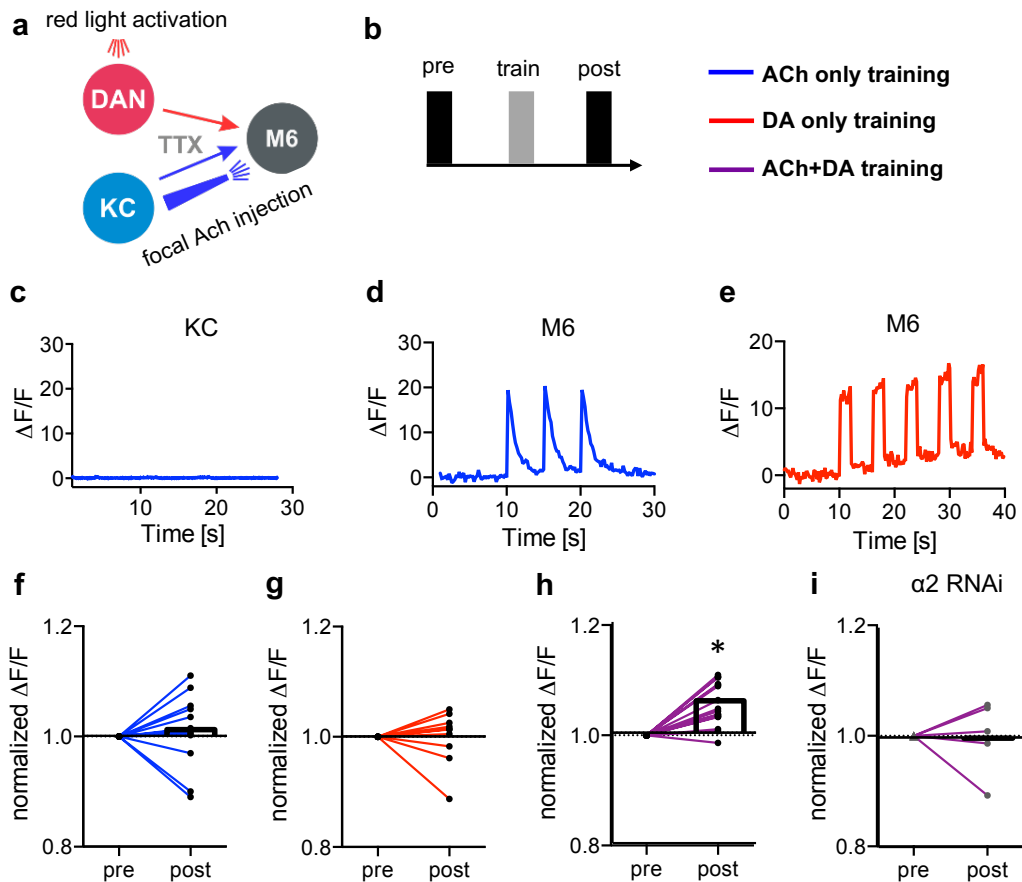

1198  
1199

1200 **Figure 3: Induction of postsynaptic plasticity bypassing the presynapses.**

1201 **a)** Connectivity scheme of MB output synapses. Cholinergic KCs and dopaminergic  
1202 neurons are presynaptic to M6 MBONs. Only connections relevant for this protocol are shown  
1203 for simplicity. Red light pulses trigger release of dopamine (DA) from dopaminergic neurons  
1204 (R58E02-LexA > lexAop-CsChrimson<sup>tdTomato</sup>), while KC input is circumvented and mimicked by  
1205 focal acetylcholine (ACh; 0.1 mM) injections to M6 dendrites in an explant brain preparation.  
1206 Postsynaptic responses at the level of M6 are measured using GCaMP6f (MB011B > UAS-  
1207 GCaMP6f). TTX in the bath suppresses feedback signaling and overall network activity within  
1208 the circuit.

1209 **b)** Training scheme (top). Baseline responses to ACh application are initially established  
1210 (pre). Subsequent training protocols consist of either pairing ACh application with simultaneous  
1211 activation of dopaminergic neurons (purple connection lines), activation of dopaminergic  
1212 neurons ('red light only', red connection lines), or ACh only (blue, connection lines). This is  
1213 followed by a test trial (post) through ACh application.

1214 **c)** Averaged traces of axonal KC calcium changes induced by focal ACh injections. No  
1215 apparent transients are observable, n = 7.

1216 **d)** Sample traces of dendritic M6 calcium changes induced by focal ACh injections.

1217 **e)** Sample traces of dendritic M6 calcium changes induced by red-light pulses.

1218 **f)** changes in acetylcholine-evoked calcium transients; comparison of mean peaks pre-  
1219 and post 'ACh only' training. Before-after plots and bar graphs (mean), n = 13, ratio paired t-  
1220 test

1221 **g)** changes in acetylcholine-evoked calcium transients; comparison of mean peaks pre-  
1222 and post 'red light only' training. Before-after plots and bar graphs (mean), n = 10 , Wilcoxon  
1223 matched-pairs signed rank test

1224 **h)** changes in acetylcholine-evoked calcium transients; comparison of mean peaks pre-  
1225 and post 'paired' training. Before-after plots and bar graphs (mean), n = 18, ratio paired t-  
1226 test, \* = p < 0.05.

1227 **i)** RNAi knock-down of the  $\alpha 2$  subunit in M4/6 MBONs impairs potentiation after paired  
1228 acetylcholine application and dopaminergic neuron activation. Before-after plots, n = 5, ratio  
1229 paired t-test

1230 See Supplementary Fig. S3 for further information.

1231

1232 **Figure 4**

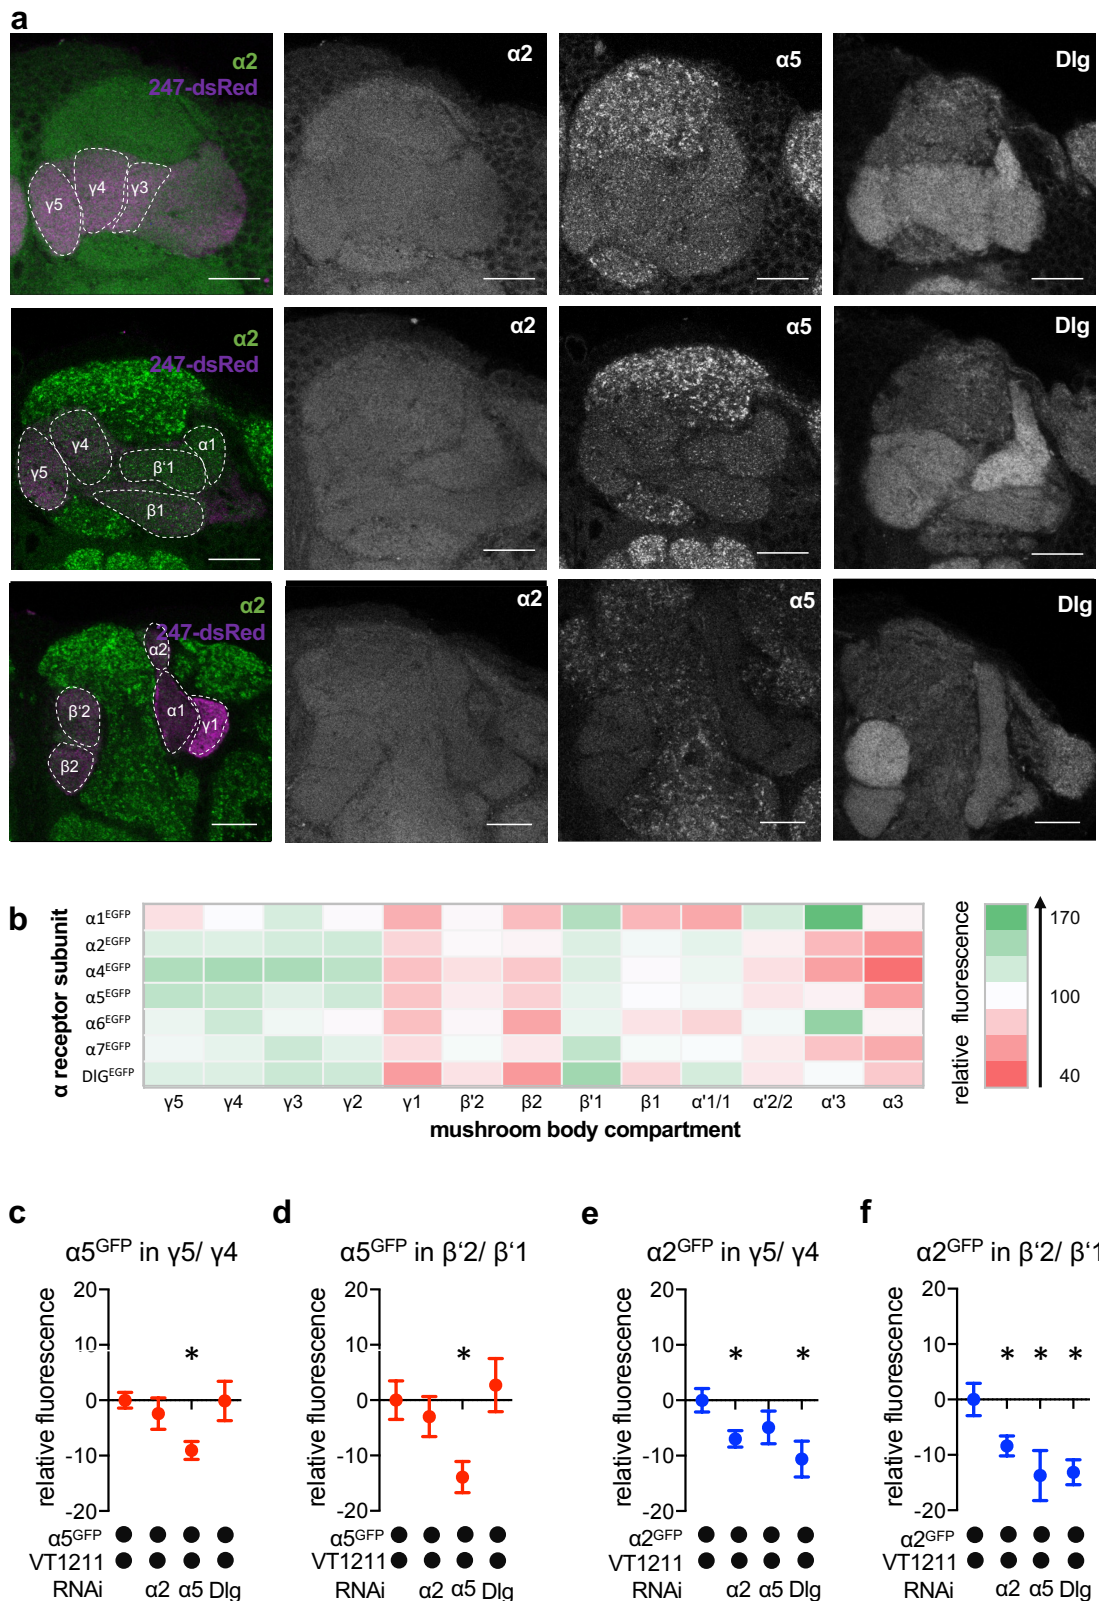

1233  
1234

1235

1236

1237 **Figure 4: nAChR  $\alpha$  subunit localization throughout the MB: MBON-specific RNAi alters**  
1238 **subunit distribution.**

1239 **a)** Representative images of the GFP-tagged nAChR subunits  $\alpha 2$  and  $\alpha 5$  as well as Dlg.  
1240 For other subunits see Supplementary Fig. S5. Scale-Bar: 20  $\mu$ m. Left: merge of  $\alpha$  subunit  
1241 signal (green) with MB compartments marked with 247-dsRed (magenta). Compartments are  
1242 indicated by dashed-lines. Top row:  $\gamma$  compartments; middle row:  $\alpha$ ,  $\beta'$ ,  $\beta$  and  $\gamma$  compartments,  
1243 bottom row:  $\alpha'$ ,  $\alpha$  and  $\beta$  compartments.

1244 **b)** Quantification of all GFP-tagged  $\alpha$  receptors (except for the  $\alpha 3$  subunit). GFP signals  
1245 for the indicated MB compartments are relative to the mean intensity of the GFP signal of the  
1246 complete MB. n = 7 – 18.

1247 **c)** Knock-down of  $\alpha 5$  in M4/6 neurons (driver line VT1211-Gal4) decreases the  $\alpha 5^{\text{GFP}}$   
1248 signal in the  $\gamma 5$  compartment (relative to unmanipulated  $\gamma 4$ ). Bar graph: normalized mean  $\pm$   
1249 SEM; n = 10 – 19; Kruskal-Wallis followed by Dunn's test ( $p < 0.05$ ), \* =  $p < 0.05$ .

1250 **d)**  $\alpha 5^{\text{GFP}}$  fluorescence is significantly decreased in the  $\beta' 2$  compartment (relative to  
1251 unmanipulated  $\beta' 1$ ) after knock-down of  $\alpha 5$  in M4/6 neurons (driver line VT1211-Gal4). Bar  
1252 graph: normalized mean  $\pm$  SEM; n = 9 – 19; Kruskal-Wallis followed by Dunn's test ( $p < 0.05$ ),  
1253 \* =  $p < 0.05$ .

1254 **e)** Knock-down of Dlg or  $\alpha 2$  in M4/6 neurons (driver line VT1211-Gal4) significantly  
1255 reduces the  $\alpha 2^{\text{GFP}}$  fluorescence within the  $\gamma 5$  compartment (relative to unmanipulated  $\gamma 4$ ). Bar  
1256 graph: normalized mean  $\pm$  SEM; n = 8 – 18; Kruskal-Wallis followed by Dunn's test ( $p < 0.05$ ),  
1257 \* =  $p < 0.05$ .

1258 **f)** Knock-down of either the  $\alpha 2$  or the  $\alpha 5$  nAChR subunit or Dlg in M4/6 neurons (driver  
1259 line VT1211-Gal4) decreases the relative fluorescence signal of  $\alpha 2^{\text{GFP}}$  in the  $\beta' 2$  compartment  
1260 (relative to unmanipulated  $\beta' 1$ ). Bar graph: normalized mean  $\pm$  SEM; n = 9 – 20; one-way  
1261 ANOVA followed by Dunnett's test ( $p < 0.05$ ), \* =  $p < 0.05$ .

1262 See Supplementary Fig. S4.

1263

1264 **Figure 5**

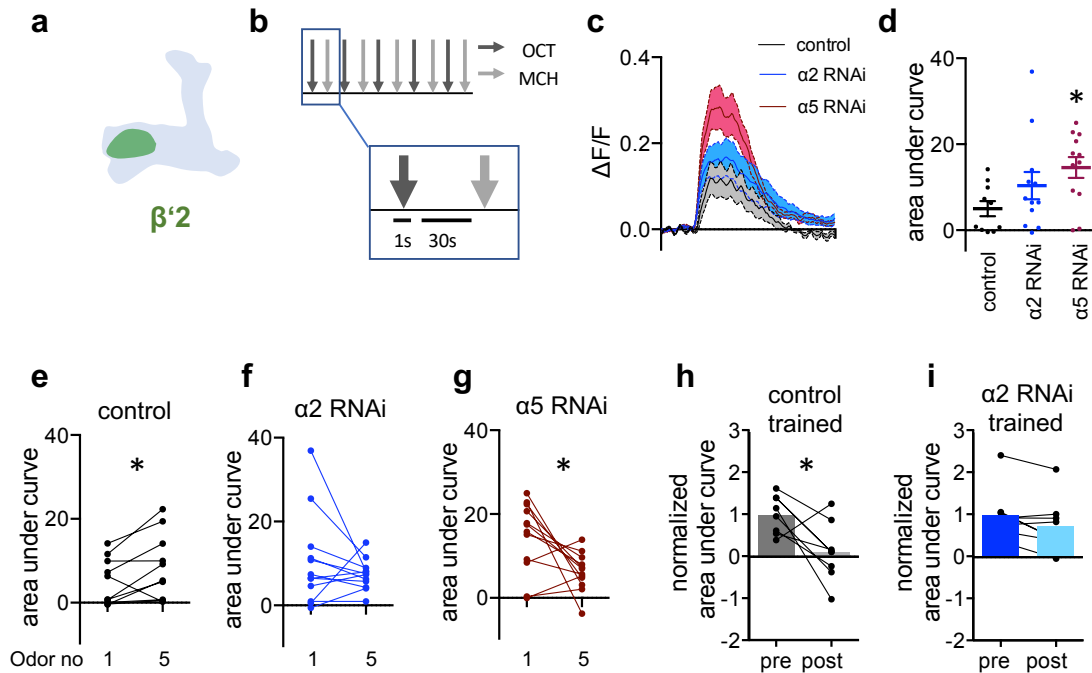

1265

1266 **Figure 5:  $\alpha 2$  is required for learning associated plasticity**

1267

**a)** Scheme indicating the imaging area at the level of the  $\beta'2$  compartment.

1268

**b)** Averaged traces of GCaMP6f responses to OCT from control (black),  $\alpha 2$  subunit RNAi (blue) and  $\alpha 5$  subunit RNAi (red; driven in M4/6 respectively; VT1211-Gal4 as driver line) flies. Solid traces are mean, shaded areas SEM;  $n = 10 - 12$ .

1269

1270

1271

**d)** Area under curve quantifications of averaged odor responses show significantly elevated odor responses to OCT following  $\alpha 5$  knock-down in M4/6 neurons (driver line VT1211-Gal4). Mean  $\pm$  SEM;  $n = 10 - 12$ ; Kruskal-Wallis followed by Dunn's test ( $p < 0.05$ ); \* =  $p < 0.05$ .

1272

1273

1274

1275

**e)** Control flies show a significant increase between the first and the fifth response to OCT. Before-after plots,  $n = 10$ ; paired t-test; \* =  $p < 0.05$ .

1276

1277

**f)**  $\alpha 2$  RNAi flies show no difference between the first and fifth odor response to OCT. nAChR subunit RNAi is driven in M4/6 neurons (driver line VT1211-Gal4). Before-after plots,  $n = 12$ ; Wilcoxon matched-pairs signed rank test

1278

1279

1280

**g)**  $\alpha 5$  RNAi flies show a significant decrease in calcium transients over the course of consecutive odor exposures. nAChR subunit RNAi is driven in M4/6 neurons (driver line VT1211-Gal4). Before-after plots,  $n = 12$ ; paired t-test; \* =  $p < 0.05$ .

1281

1282

1283

**h)** Control flies show a significant decrease in GCaMP6f responses to MCH following absolute training. Before-after plots and bar graphs (mean),  $n = 8$ ; paired t-test; \* =  $p < 0.05$ .

1284

1285

**i)**  $\alpha 2$  RNAi flies show no significant decrease in the GCaMP6f response to MCH following absolute training (driver line VT1211-Gal4). Before-after plots and bar graphs (mean),  $n = 8$ ; Wilcoxon matched-pairs signed rank test, \* =  $p < 0.05$ .

1286

1287

1288

1289 See Supplementary Fig. S5 for further information.

1290 **Figure 6**  
1291

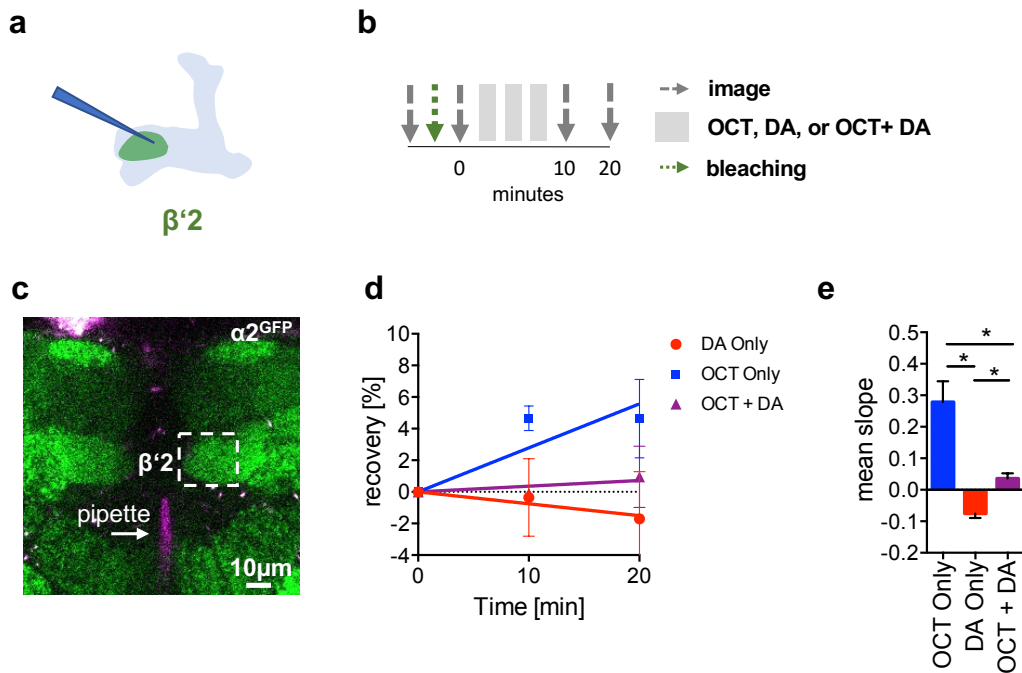

1292  
1293

1294 **Figure 6:  $\alpha 2$  nAChR subunits dynamically rearrange**

1295 **a)** Scheme of the site of dopamine injection during fluorescence recovery after  
1296 photobleaching (FRAP) experiments at the level of the KC-MBON synapses of the  $\beta'2$   
1297 compartment.

1298 **b)** FRAP experimental protocol. After bleaching, a baseline picture was taken followed  
1299 by odor presentation or odor presentation simultaneously with dopamine injection or dopamine  
1300 injection by itself. Fluorescence recovery was monitored at the 10 and 20 minute time points.

1301 **c)** Example image of  $\alpha 2^{GFP}$  expression; white dashed box shows the  $\beta'2$  output zone;  
1302 dopamine injection pipette (with Texas Red) is labelled in magenta.

1303 **d)** Linear regression of fluorescence recovery after bleaching. OCT exposure (red line),  
1304 OCT exposure simultaneously with dopamine (DA) injection (blue line), dopamine injection  
1305 alone (green line)

1306 **e)** After bleaching,  $\alpha 2^{GFP}$  flies were exposed to either dopamine, odor only, or odor paired  
1307 with dopamine injection.; Bar graphs: mean  $\pm$  SEM; n = 3 – 5; one-way ANOVA followed by  
1308 Tukey's test ( $p < 0.05$ ). \* =  $p < 0.05$ . Note that controls without any stimulus application also  
1309 show no recovery (not shown). Please compare to alternate protocol in Fig. S6.

1310 See Supplementary Fig. S6 for further information.

1311



1312 **Figure 7**

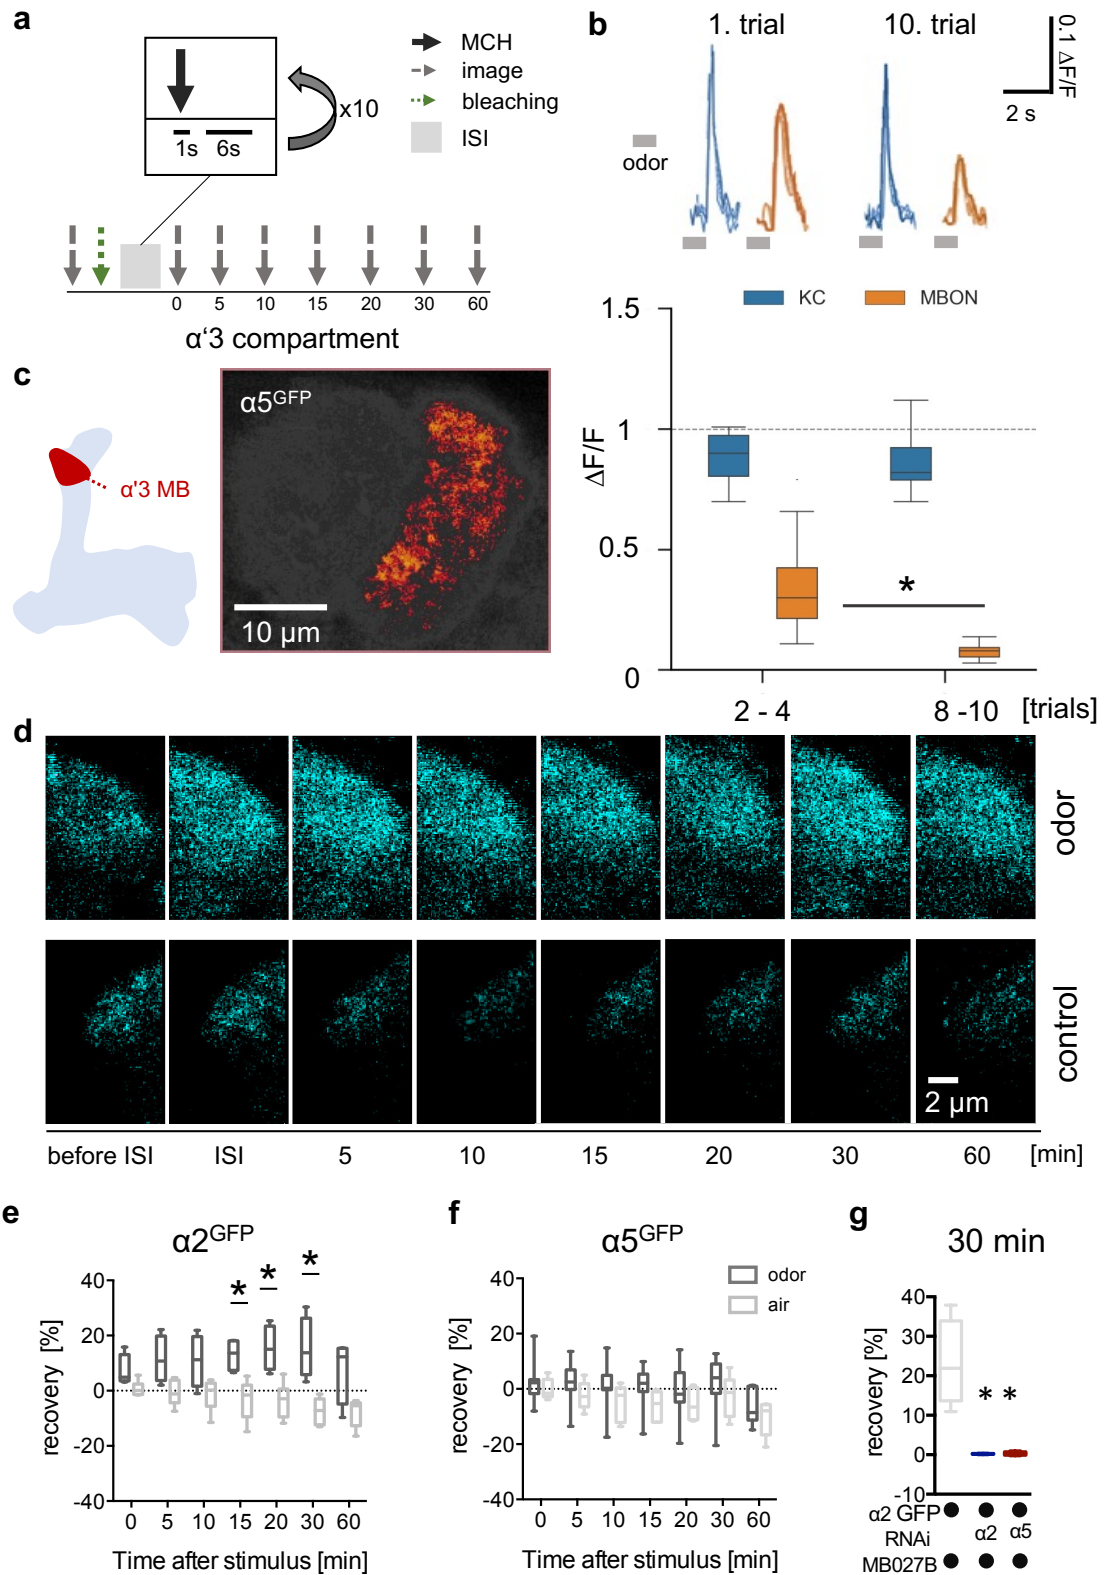

1313

1314

1315

**Figure 7: Non-associative plasticity alters postsynaptic  $\alpha 2$  subunit receptor dynamics**

1316

**a)** Training scheme indicating odor application, bleaching and imaging time points. MCH was given 10 times for 1 second with a pause of 6 seconds in-between. Images were taken

1317

1318 after training in absence of odor immediately afterwards and 5, 10, 15, 20, 30 and 60 minutes  
1319 later.

1320 **b)** Top: Calcium peaks in response to odor stimuli of presynaptic KCs (MB369B as driver  
1321 line) and adjacent postsynaptic MBONs (driver line: MB027B). Individual calcium responses to  
1322 trials 1 and 10 for MBONs (orange lines) and KCs (blue lines). Bottom: Averaged calcium  
1323 responses to odor stimuli of presynaptic KCs and postsynaptic MBONs of trials 2 - 4 and 8 - 10  
1324 respectively. Responses decrease at the level of MBONs but not at the level of KCs over ten  
1325 trials. Box plots are median and 75 % quartiles;  $n = 6 - 7$ ; Kruskal-Wallis followed by Dunn's  
1326 test ( $p < 0.05$ ), \* =  $p < 0.05$ .

1327 **c)** Scheme of  $\alpha'3$  compartment analyzed and representative  $\alpha 5^{GFP}$  fluorescent image  
1328 (smoothed). Scale bar: 10  $\mu\text{m}$ .

1329 **d)** Example images of  $\alpha 2^{GFP}$  FRAP experiment at the level of the  $\alpha'3$  compartment at  
1330 specific time points before and after training. Top row, after training; bottom row: control  
1331 settings. Scale bar: 2  $\mu\text{m}$ .

1332 **e)** FRAP of  $\alpha 2^{GFP}$  nAChR subunit in the  $\alpha'3$  compartment after odor presentation.  $\alpha 2^{GFP}$   
1333 shows significant recovery following odor training compared to the controls. Recovery rate is  
1334 normalized to the baseline recorded after selective bleaching of the  $\alpha'3$  MB compartment. Box  
1335 plots are median and 75 % quartiles;  $n = 4 - 6$ ; multiple t - tests with Sidak-Bonferroni correction,  
1336 \* =  $p < 0.05$ .

1337 **f)** FRAP of  $\alpha 5^{GFP}$  subunit in the  $\alpha'3$  compartment after odor presentation.  $\alpha 5^{GFP}$  did not  
1338 show significant recovery compared to the controls. Recovery rate is normalized to the baseline  
1339 recorded after selective bleaching of  $\alpha'3$  MB compartment. Box plots are median and 75 %  
1340 quartiles;  $n = 5 - 7$ , multiple t - tests with Sidak-Bonferroni correction.

1341 **g)** FRAP of  $\alpha 2^{GFP}$  nAChR subunit in the  $\alpha'3$  compartment after odor presentation and  
1342 knockdown of either the  $\alpha 2$  or  $\alpha 5$  subunit in the  $\alpha'3$  MBON (driver line MB027B) .  $\alpha 2^{GFP}$  shows  
1343 significantly impaired recovery 30 min after odor training in  $\alpha 2$  or  $\alpha 5$  knockdown animals  
1344 compared to the controls. Recovery rate is normalized to the baseline recorded after selective  
1345 bleaching of the  $\alpha'3$  MB compartment. Box plots are minimum value to maximum value;  
1346  $n = 4 - 5$ ; Kruskal-Wallis followed by Dunn's test ( $p < 0.05$ ), \* =  $p < 0.05$ .  
1347

1348 See Supplementary Fig. S7 for further information.

1349

1350 **Figure 8**

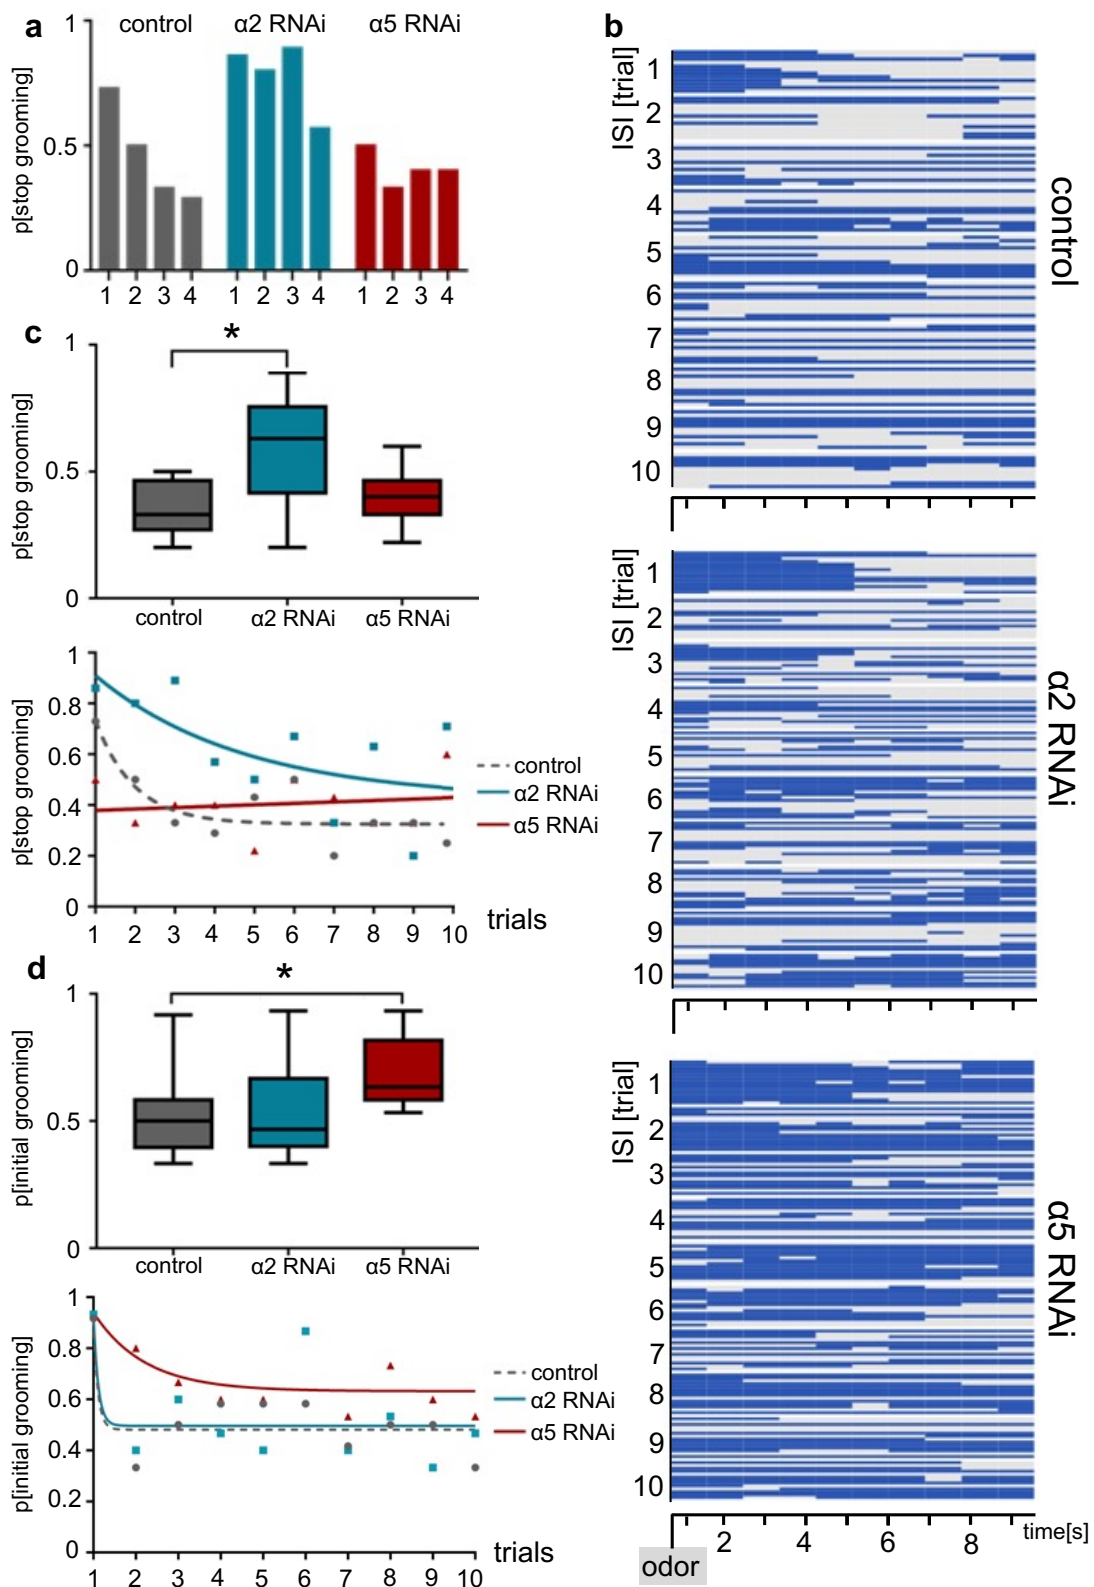

1351  
1352

**Figure 8:  $\alpha 2$  and  $\alpha 5$  nAChR subunits are required for non-associative familiarity learning at the level of  $\alpha'3$  MBONs.**

1353

1354

1355

1356

**a)** Knock-down of  $\alpha$  nAChR subunits at the level of  $\alpha'3$  MBONs alters odor familiarity learning and the probability to stop grooming.  $\alpha 2$  RNAi knock-down delays familiarity learning effects to novel odors.  $\alpha 5$  RNAi knock-down flies do not show a novelty response at all.

1357

1358 **b)** Grooming behavioral response of dusted flies following the repeated presentations of  
1359 a novel odor (MCH). Ethogram of grooming behavior (blue) during ten intervals of odor  
1360 exposures. Horizontal lines in each trial correspond to a single experimental fly within a trial  
1361 group. Not grooming (grey) flies can further be categorized between pausing and wandering  
1362 (see Supplementary Figure S8). n = 15.

1363 **c)** Knock-down of  $\alpha 2$  subunit in  $\alpha 3$  MBONs (driver line MB027B) impairs odor familiarity  
1364 learning significantly by showing a higher probability to terminate grooming responses during  
1365 the learning period. The learning period is defined as the odor exposure rounds following the  
1366 first exposure). Bottom graph: non-linear representation of grooming flies over ten training trials.  
1367 Note that  $\alpha 5$  behavioral responses are best described by linear representation. Box plots are  
1368 median and 75 % quartiles; n = 9, one-way ANOVA followed by Dunnett's test ( $p < 0.05$ ) \* = p  
1369  $< 0.05$ .

1370 **d)** Knock-down of  $\alpha 5$  subunits in  $\alpha 3$  MBONs (driver line MB027B) leads to an increased  
1371 probability to start grooming earlier. 'Grooming' is defined here as constantly grooming during  
1372 2 and 3 seconds after odor delivery. Bottom graph, non-linear representation of grooming flies  
1373 over ten training trials. Box plots are median and 75 % quartiles; n = 9; Kruskal-Wallis followed  
1374 by Dunn's test ( $p < 0.05$ ), \* =  $p < 0.05$ .

1375 See Supplementary Fig. S8 for further information and supplementary table for further statistics.

1376

1377

1378 **Figure 9**

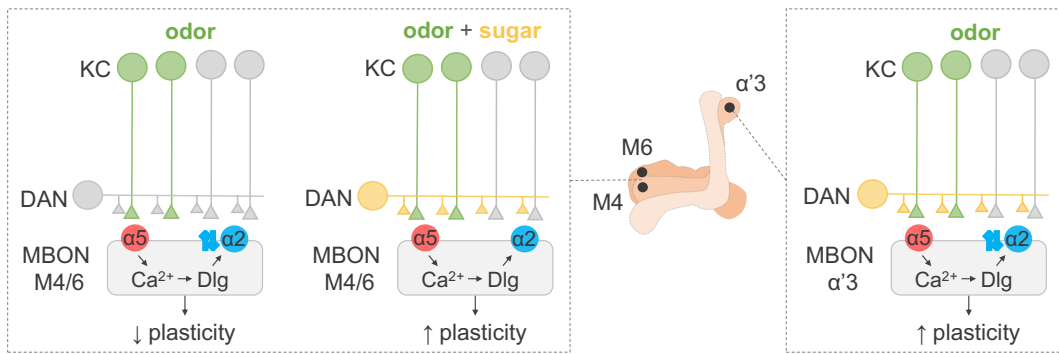

1379

1380 **Figure 9: Model of postsynaptic plasticity sequence across compartments**

1381

1382 Our data are consistent with a model in which α5-subunit containing receptors (red) mediate  
1383 the early phase of postsynaptic memory storage, potentially by leading to elevated postsynaptic  
1384 calcium flux. Concurrent events see changed dynamics of the α2 receptor (blue) that are  
1385 regulated by Dlg. Nicotinic receptor subunits hereby likely interact with adaptor proteins to bind  
1386 to Dlg. Importantly, we identify elevated α2 subunit dynamics in the context of associative  
1387 (M4/6; KC (green) and dopaminergic neuron (yellow) activation needed for memory formation)  
1388 and non-associative (α'3 MBONs; odor activated both KCs (green) and DANs (yellow)) memory  
1389 expression. Increased α2 subunit dynamics in both cases are triggered by odor application. At  
1390 the level of M4/6, suppressed dynamics (concurrent activation of KC (green) and DAN yellow),  
1391 would correspond to postsynaptic depression, while at the level of α'3 MBONs increased  
1392 dynamics result in postsynaptic depression. Therefore, different learning rules likely govern the  
1393 incorporation, exchange or stabilization of receptors in or out of synapses. Please see  
1394 discussion for further details.

1395

1396  
1397

## Supplementary Information

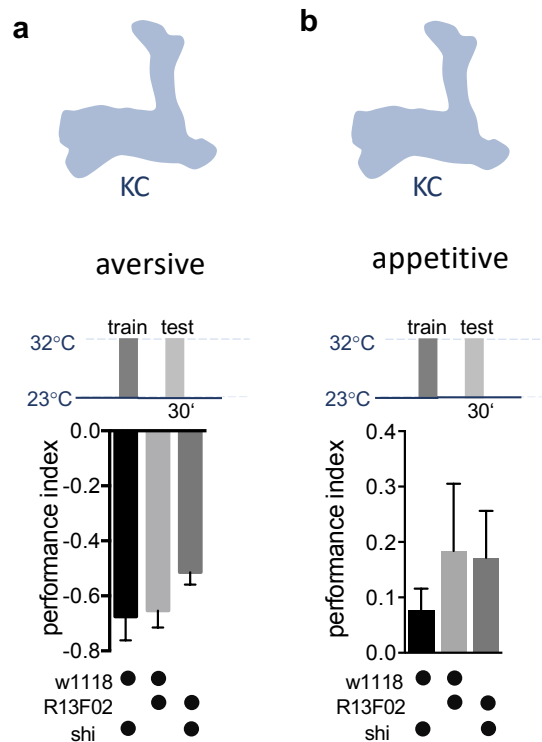

1398  
1399  
1400  
1401  
1402  
1403

**Supplementary Figure 1. Permissive temperature controls accompanying Fig. 1.**

1404  
1405  
1406

- a)** Permissive temperature control for experiments shown in Fig. 1a. 30 min aversive memory performance when training at 23°C (driver line R13F02-Gal4). Bar graphs: mean  $\pm$  SEM; n = 7 – 9; Kruskal-Wallis followed by Dunn's test ( $p = 0.08$ ).
- b)** Permissive temperature control for experiments shown in Fig. 1b. 30 min appetitive memory performance when training at 23°C (driver line R13F02-Gal4). Bar graphs: mean  $\pm$  SEM; n = 6 – 8; Kruskal-Wallis followed by Dunn's test ( $p = 0.7$ ).

1407

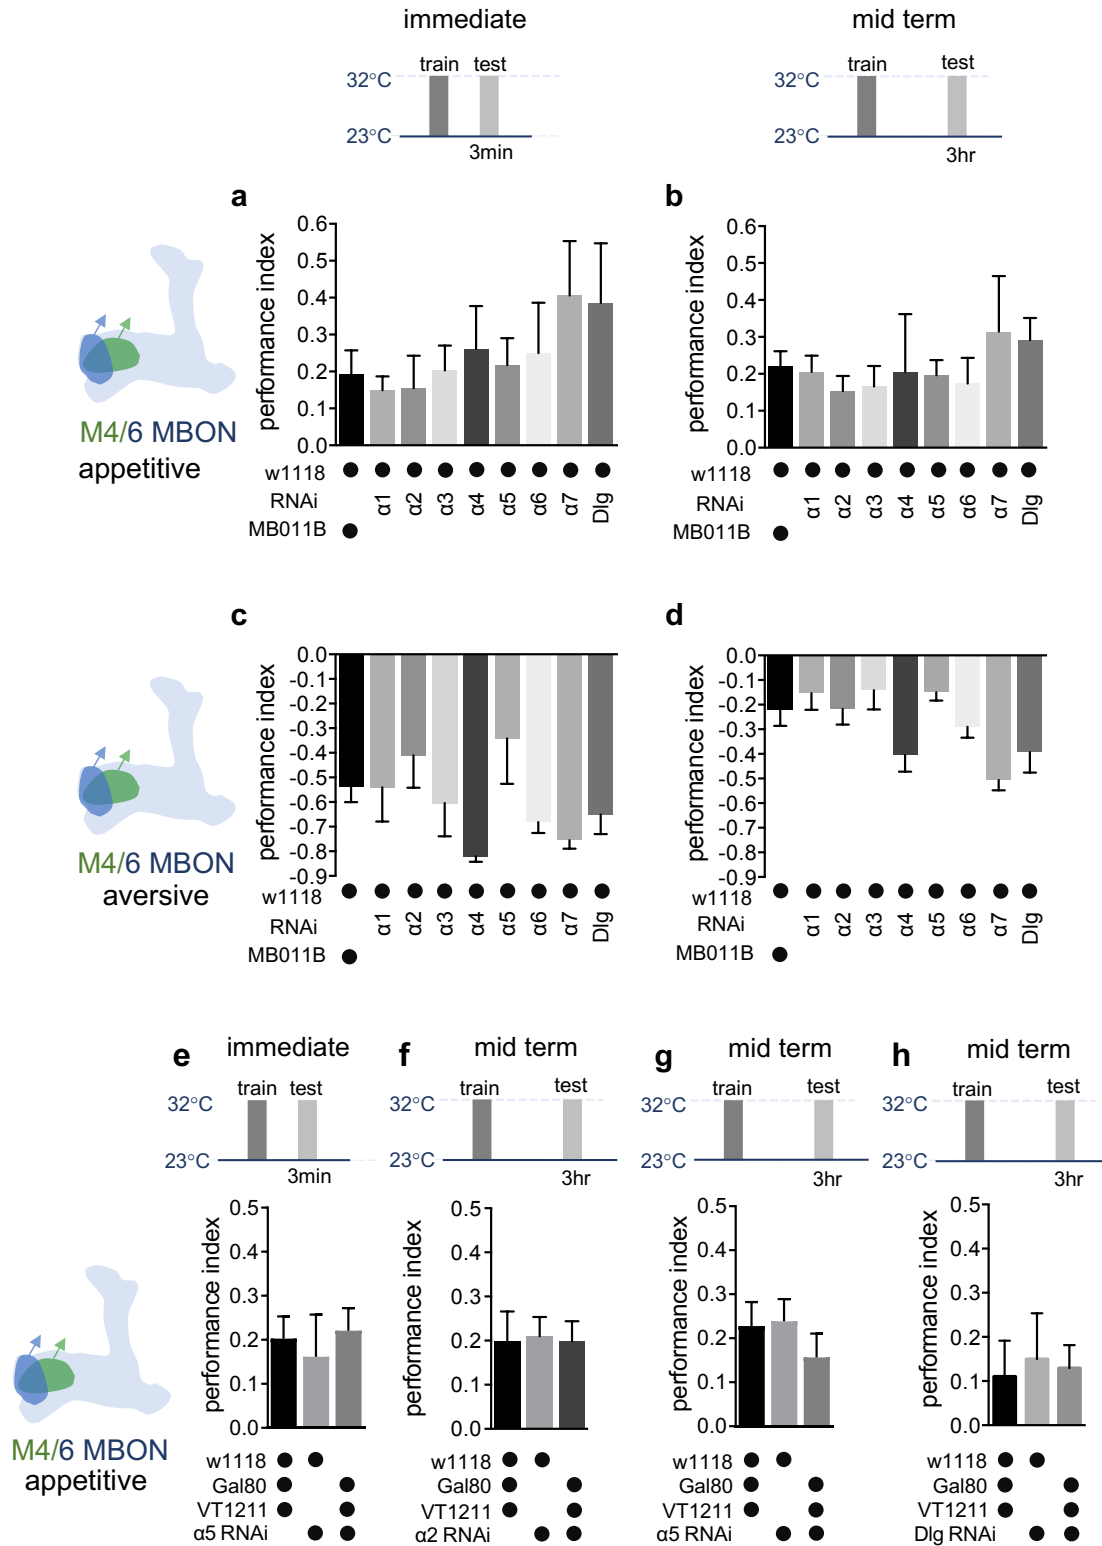

1408  
1409

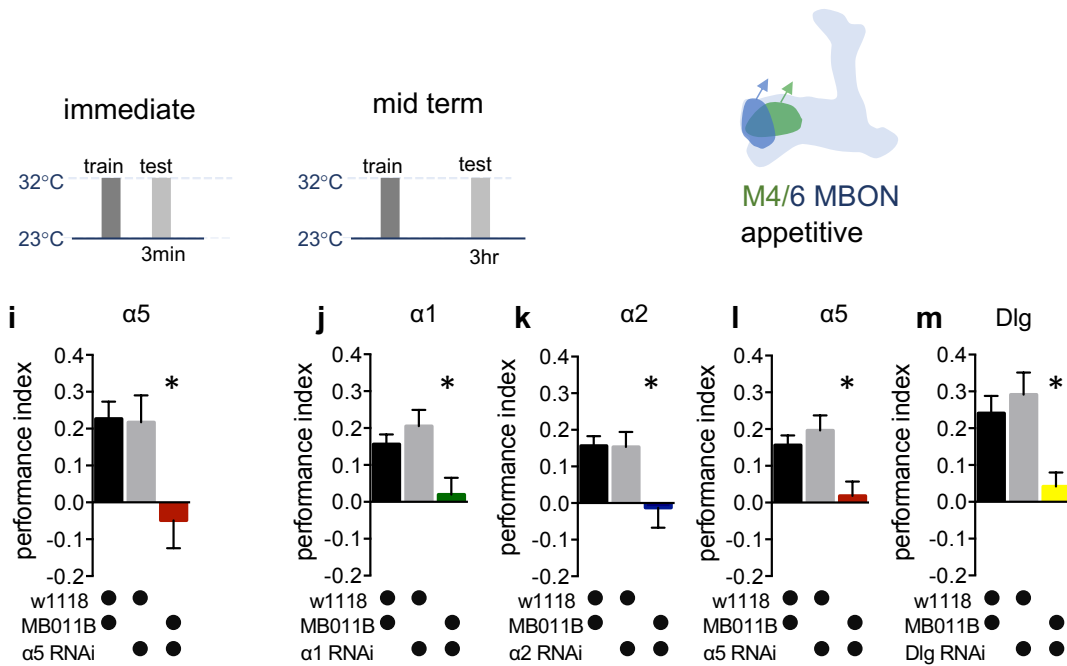

**Supplementary Figure 2. Genetic controls and alternate data display accompanying Fig. 2**

1410  
1411  
1412  
1413  
1414  
1415  
1416  
1417  
1418  
1419  
1420  
1421  
1422  
1423  
1424  
1425  
1426  
1427  
1428  
1429  
1430  
1431  
1432  
1433  
1434  
1435  
1436  
1437  
1438  
1439

- a)** Immediate appetitive memory is not impaired in genetic control groups. Bar graphs: mean  $\pm$  SEM;  $n = 7 - 11$ , for controls:  $n = 16$ ; one-way ANOVA followed by Tukey's test ( $p > 0.05$ ).
- b)** 3-hour appetitive memory is not impaired in genetic control groups. Bar graphs: mean  $\pm$  SEM;  $n = 7 - 33$ , for controls:  $n = 41$ ; one-way ANOVA followed by Tukey's test ( $p > 0.05$ ).
- c)** Immediate aversive learning is not impaired in genetic control groups. Bar graphs: mean  $\pm$  SEM;  $n = 6 - 10$ , for controls:  $n = 13$ ; Kruskal-Wallis followed by Dunn's test ( $p > 0.05$ ).
- d)** 3-hour aversive memory is not impaired in genetic control groups. Bar graphs: mean  $\pm$  SEM;  $n = 6 - 10$ , for controls:  $n = 15$ ; Kruskal-Wallis followed by Dunn's test ( $p > 0.05$ ).
- e)** RNAi knock-down of the  $\alpha 5$  subunit in M4/6 MBONs (driver line VT1211-Gal4) is suppressed using Gal80<sup>ts</sup>. Immediate memories is not impaired. Bar graphs: mean  $\pm$  SEM;  $n = 9$ ; one-way ANOVA followed by Tukey's test.
- f)** RNAi knock-down of the  $\alpha 2$  subunit in M4/6 MBONs (driver line VT1211-Gal4) is suppressed using Gal80<sup>ts</sup>. Mid term memory is not impaired. Bar graphs: mean  $\pm$  SEM;  $n = 9 - 11$ ; one-way ANOVA followed by Tukey's test.
- g)** RNAi knock-down of the  $\alpha 5$  subunit in M4/6 MBONs (driver line VT1211-Gal4) is suppressed using Gal80<sup>ts</sup>. Mid term memory is not impaired. Bar graphs: mean  $\pm$  SEM;  $n = 10 - 11$ ; one-way ANOVA followed by Tukey's test.
- h)** RNAi knock-down of Dlg in M4/6 MBONs (driver line VT1211-Gal4) is suppressed using Gal80<sup>ts</sup>. Mid term memory is not impaired. Bar graphs: mean  $\pm$  SEM;  $n = 8 - 10$ ; one-way ANOVA followed by Tukey's test.
- (i-m) Alternate display (see methods for details) for appetitive memory experiments shown in Fig. 2a,b:



- 1440  
1441  
1442
- i)** Immediate appetitive memories are impaired following RNAi knock-down of the  $\alpha 5$  nAChR subunit in M4/6 MBONs (driver line MB011B). Bar graphs: mean  $\pm$  SEM; n = 9 – 21; one-way ANOVA followed by Tukey’s test ( $p < 0.05$ ), \* =  $p < 0.05$ .
- 1443  
1444  
1445
- j)** 3hr appetitive learning is impaired by RNAi knock-down of the  $\alpha 1$  nAChR subunit in M4/6 MBONs (driver line MB011B). Bar graphs: mean  $\pm$  SEM; n = 25 – 51; Kruskal-Wallis followed by Dunn’s test ( $p < 0.05$ ), \* =  $p < 0.05$ .
- 1446  
1447  
1448
- k)** RNAi knock-down of the  $\alpha 2$  nAChR subunit in M4/6 MBONs (driver line MB011B) impairs 3-hour appetitive memories. Bar graphs: mean  $\pm$  SEM; n = 27 – 51; Kruskal-Wallis followed by Dunn’s test ( $p < 0.05$ ), \* =  $p \leq 0.05$ .
- 1449  
1450  
1451
- l)** 3hr appetitive learning is impaired by RNAi knock-down of the  $\alpha 5$  nAChR subunit in M4/6 MBONs (driver line MB011B). Bar graphs: mean  $\pm$  SEM; n = 27 – 51; one-way ANOVA followed by Tukey’s test ( $p < 0.05$ ), \* =  $p < 0.05$ .
- 1452  
1453  
1454
- m)** RNAi knock-down of Dlg in M4/6 MBONs (driver line MB011B) impairs 3-hour appetitive memories. Bar graphs: mean  $\pm$  SEM; n = 13 – 31; one-way ANOVA followed by Tukey’s test ( $p < 0.05$ ), \* =  $p < 0.05$ .

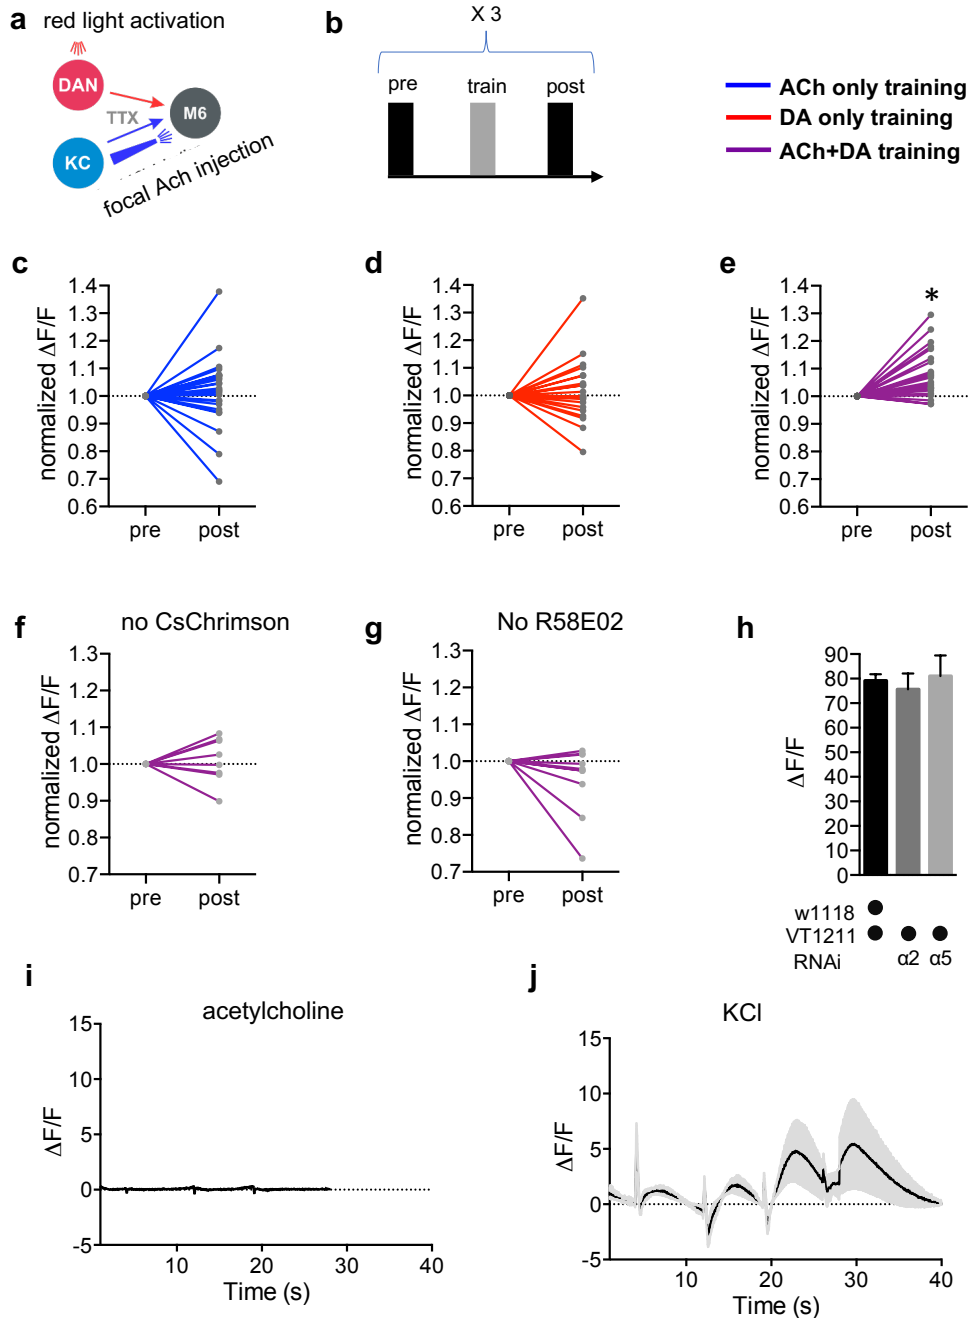

1455

1456

1457

**Supplementary Figure 3. Control experiments for Fig. 3.**

1458

**a)** Connectivity scheme of MB output synapses. Also shown in Fig. 3.

1459

**b)** Training scheme (top). Also shown in Fig. 3. All three types of training were subsequently performed within one fly.

1460

1461

**c)** Changes in ACh evoked calcium transients after `ACh only` training using an alternative protocol to Fig. 3. (see Methods). Before-after plots,  $n = 26$ , Wilcoxon matched-pairs signed rank test.

1462

1463

1464

1465

1466

**d)** Changes in ACh evoked calcium transients after `Dopamine only` (DA) training using an alternative protocol to Fig. 3. (see Methods). Before-after plots,  $n = 21$ , ratio paired t-test.

1467

1468

1469

1470

- 1471            **e)** Changes in ACh evoked calcium transients after `paired` training using an alternative  
1472            protocol to Fig. 3. (see Methods). Paired ACh injection and dopaminergic neuron  
1473            activation leads to potentiation. Before-after plots, n = 24, ratio paired t-test, \* = p <  
1474            0.05.  
1475
- 1476            **f)** Control experiments for Fig. 3 f-h. Paired training protocol in the absence of LexAOP-  
1477            csChrimson; n = 8; ratio paired t-test  
1478
- 1479            **g)** Control experiments for Fig. 3 f-h. Paired training protocol in the absence of R58E02-  
1480            LexA. n = 10; Wilcoxon matched-pairs signed rank test
- 1481            **h)** GCaMP6f responses following focal ACh injections to the  $\gamma 5$  compartment of the MB  
1482            are not significantly altered following  $\alpha 2$  or  $\alpha 5$  knock-down in the M4/6 MBONs (driver  
1483            line VT1211-Gal4). The bath contains TTX to suppress spontaneous neural activity.  
1484            Bar graphs: mean  $\pm$  SEM; n = 12 – 23; one-way ANOVA followed by Dunnett's test  
1485            ( $p > 0.05$ ).
- 1486            **i)** Averaged synaptophluorin responses following focal ACh injections (0.1 mM) to the  
1487             $\gamma 5$  compartment of the MB using the OK107-Gal4 driver, n = 8.
- 1488            **j)** Averaged synaptophluorin responses following focal KCl injections (300-400 mM) to  
1489            the  $\gamma 5$  compartment of the MB using the OK107-Gal4 driver, n = 4.
- 1490

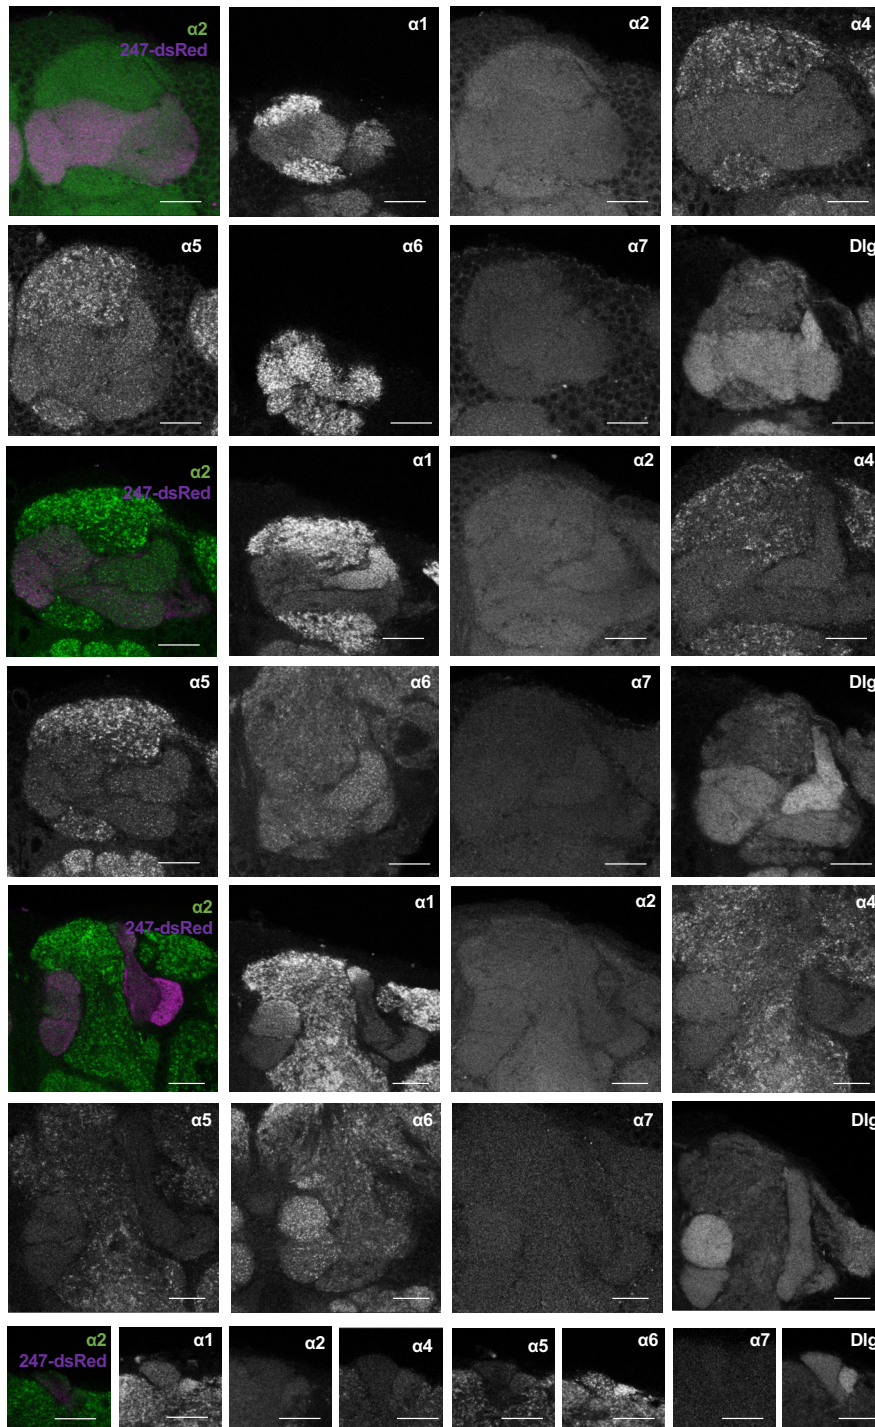

1491

1492

1493

1494

**Supplementary Figure 4. Detailed distribution of  $\alpha$  subunits in the MB accompanying Fig. 4**

1495 Example image planes of GFP expression at the level of the MB compartments for all  $\alpha$  nAChR

1496 subunits (except for  $\alpha 3$ ) and Dlg. Scale-Bar: 20  $\mu\text{m}$ . Left: merged image of  $\alpha$  subunit signal

1497 (green) with MB compartments marked by 247-dsRed (magenta). Top two rows:  $\gamma$

1498 compartments; middle two rows:  $\gamma$ ,  $\beta'$  and  $\beta$  compartments, bottom three rows:  $\alpha'/\beta'$  and  $\alpha/\beta$ ,

1499 with bottom row:  $\alpha'$  and  $\alpha$  compartments.

1500

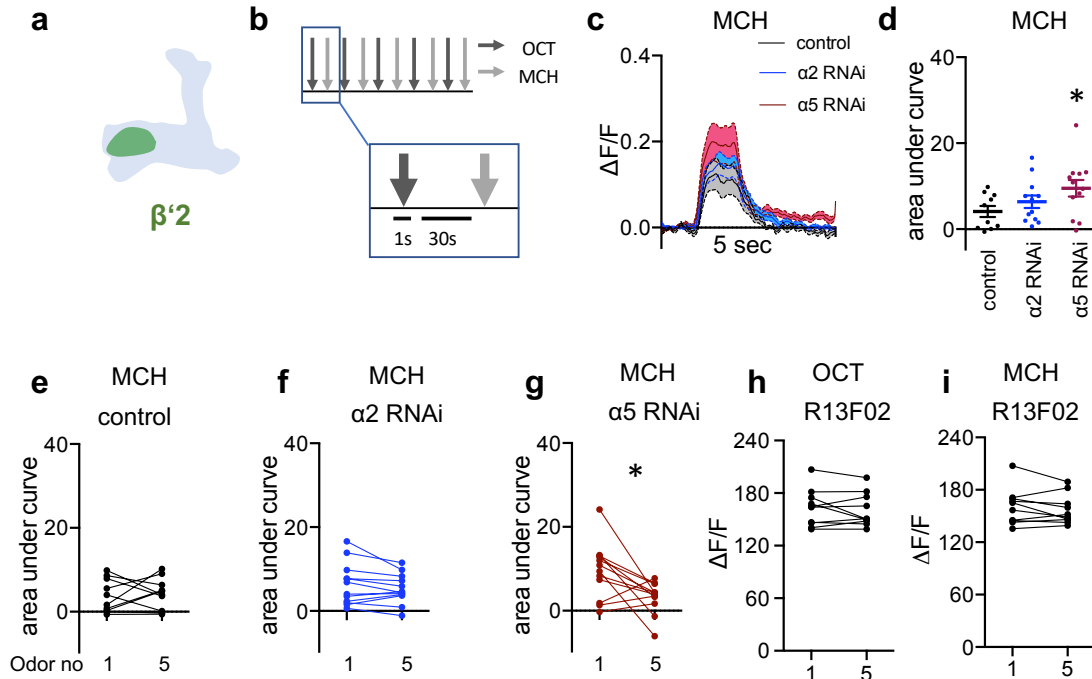

**Supplementary Figure 5. Additional data accompanying Fig. 5.**

1501  
1502  
1503  
1504

a) Scheme indicating the imaging area at the level of the  $\beta'2$  compartment.

1505  
1506  
1507

b) Odor exposure protocol. 5 OCT stimuli were alternately administered with 5 MCH stimuli. 1 second odor puffs were separated by 30 seconds breaks. Odor responses are measured using GCaMP6f as in Fig 5.

1508  
1509  
1510

c) Averaged traces of GCaMP6f (calcium) responses to MCH from control (black),  $\alpha2$  (blue) and  $\alpha5$  RNAi (red; driven in M4/6 respectively, driver line VT1211-Gal4) flies. Solid traces are mean, shaded areas SEM;  $n = 10 - 12$ .

1511  
1512  
1513  
1514

d) Area under curve quantification of averaged odor responses show significantly elevated odor responses to MCH following  $\alpha5$  knock-down in M4/6 neurons (driver line VT1211-Gal4). Mean  $\pm$  SEM; one-way ANOVA followed by Dunnett's test ( $p < 0.08$ ), \* =  $p < 0.05$ ;  $n = 10 - 12$ .

1515  
1516

e) Control flies show no significant increase between the first and the fifth response to MCH.  $n = 10$ ; paired t-test

1517  
1518

f)  $\alpha2$  RNAi flies show no difference between the first and fifth odor response to MCH. nAChR subunit RNAi is driven in M4/6 neurons (driver line VT1211-Gal4).  $n = 12$ ; paired t-test.

1519  
1520  
1521

g)  $\alpha5$  RNAi flies show a significant decrease in calcium transients over the course of consecutive odor exposures. nAChR subunit RNAi is driven in M4/6 neurons (driver line VT1211-Gal4).  $n = 12$ ; Wilcoxon matched-pairs signed rank test; \* =  $p < 0.05$ .

1522  
1523

h) KCs (driver line R13F02-Gal4) show no significant change in calcium transients over the consecutive OCT odor exposures.  $n = 10$ ; paired t-test.

1524  
1525

i) KCs (driver line R13F02-Gal4) show no significant change in calcium transients over the consecutive MCH odor exposures.  $n = 10$ ; paired t-test.

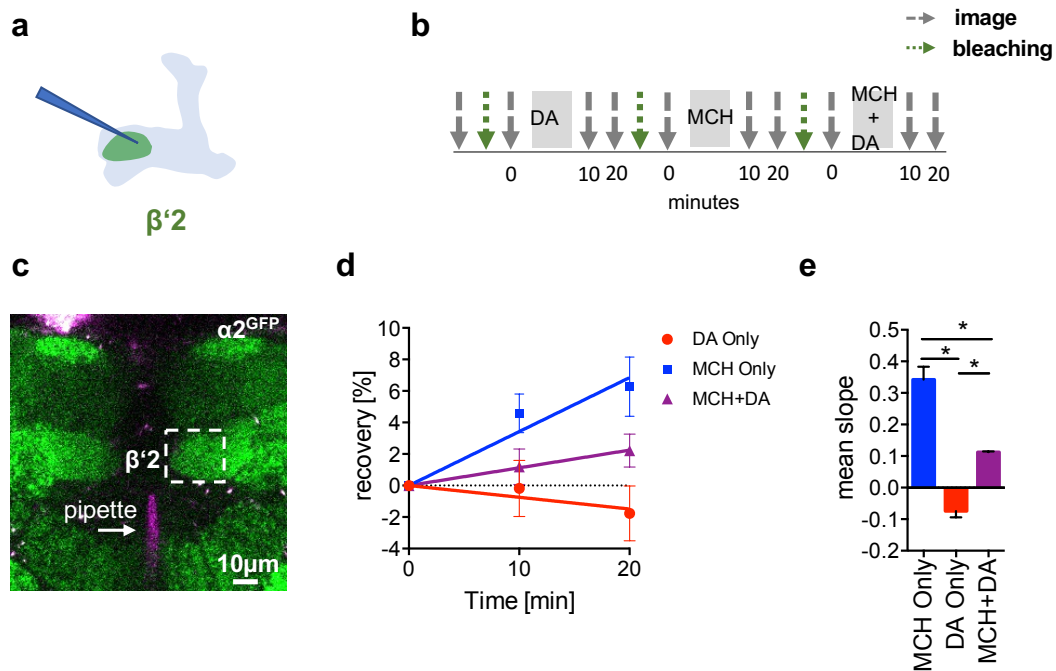

1526

1527

**Supplementary Fig. 6. Receptor subunit recovery, accompanying Fig. 6.**

1528

1529

1530

**a)** Scheme of the site of dopamine injection during fluorescence recovery after photobleaching (FRAP) experiments at the level of the KC-MBON synapses of the  $\beta'2$  compartment.

1531

1532

1533

1534

**b)** FRAP experimental protocol. After bleaching the baseline picture was taken followed by odor presentation or odor presentation simultaneously with dopamine injection or dopamine injection by itself in the same fly. Fluorescence recovery was monitored at the 10- and 20-minute time points.

1535

1536

1537

**c)** Example image of  $\alpha 2^{GFP}$  expression (the same as in Fig. 6 for illustration); white dashed box shows the  $\beta'2$  output zone; dopamine injection pipette (with Texas Red) is labelled in magenta.

1538

1539

1540

**d)** Linear regression of fluorescence recovery after bleaching. MCH exposure (red line), MCH exposure simultaneously with dopamine (DA) injection (blue line), dopamine injection alone (green line)

1541

1542

1543

1544

**e)** After bleaching,  $\alpha 2^{GFP}$  flies were exposed to either dopamine, odor only, or odor paired with dopamine injection.; Bar graphs: mean  $\pm$  SEM; n = 9 – 10; one-way ANOVA followed by Tukey's test ( $p < 0.05$ ). \* =  $p < 0.05$ . Note that controls without any stimulus application also show no recovery (not shown).

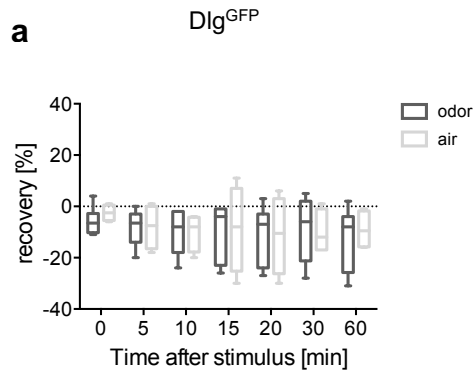

1545  
1546  
1547  
1548  
1549  
1550

**Supplementary Fig. 7.  $Dlg^{GFP}$  FRAP, accompanying Fig. 7**

- a)** FRAP of  $Dlg^{GFP}$  in  $\alpha'3$  MBONs.  $Dlg^{GFP}$  did not show significant recovery. Recovery rate is normalized to the baseline recorded after selective bleaching of the  $\alpha'3$  MB compartment. n = 5 - 7; multiple t-tests

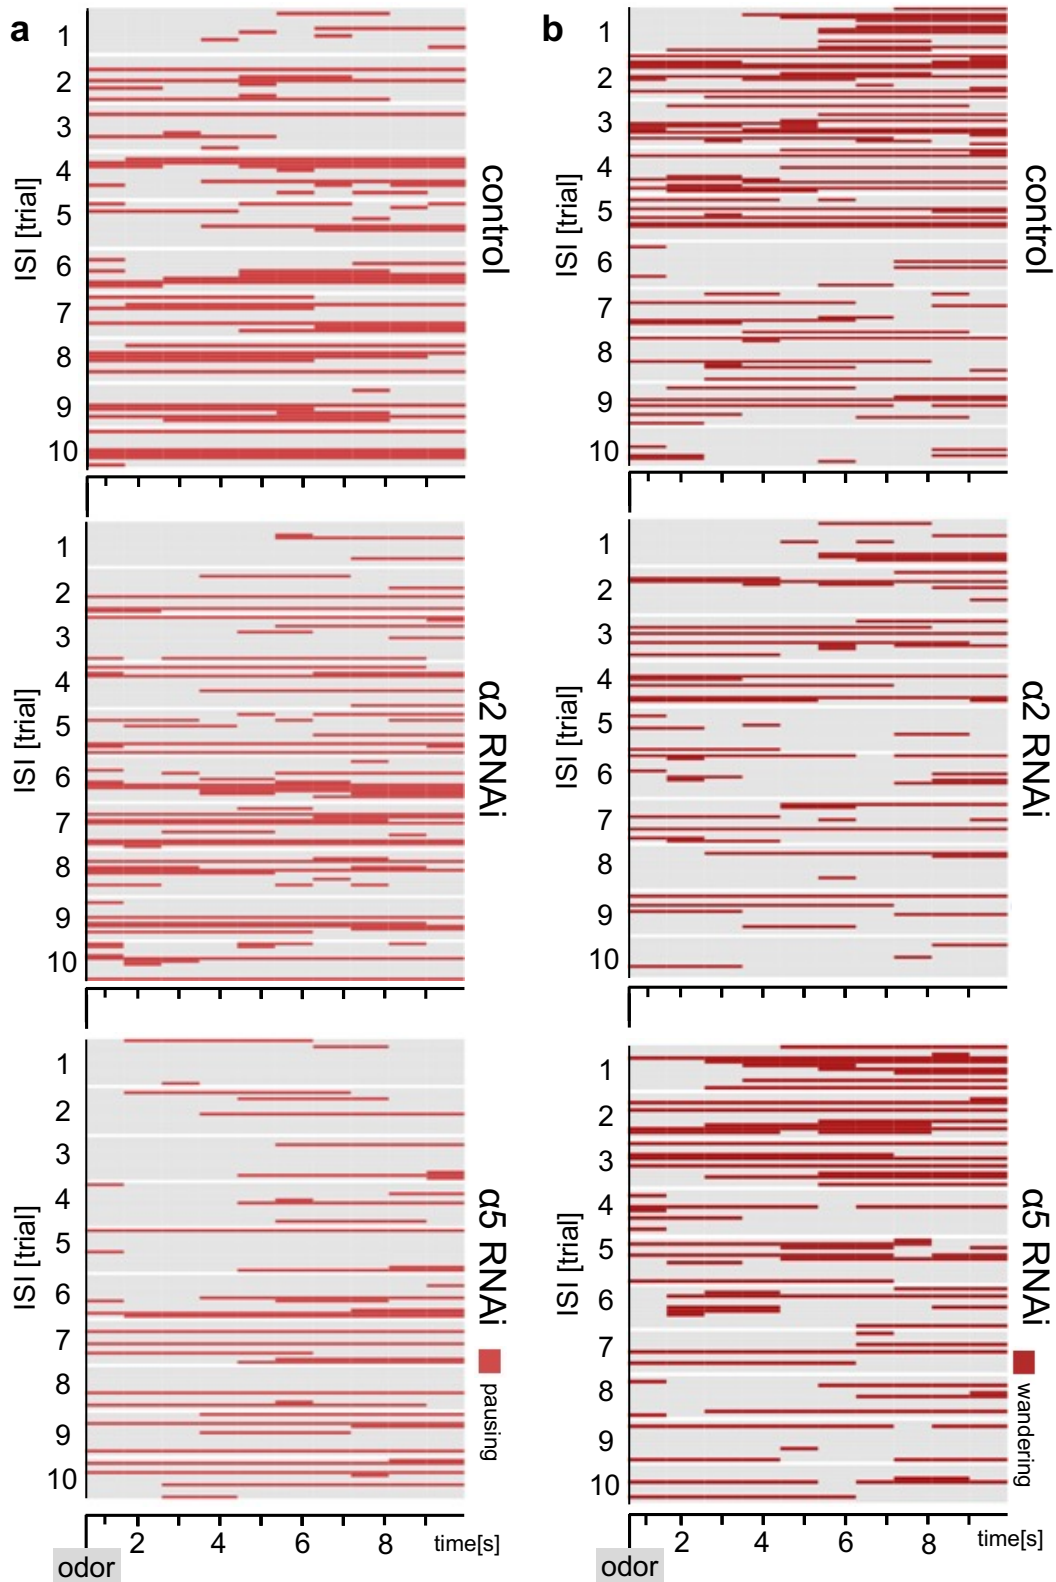

Supplementary Fig. 8. Additional Ethograms, accompanying Fig. 8.

**a, b)** Ethograms of the behavioral responses of flies shown in Fig. 8 with additional behavioral categories of pausing and wandering (when not grooming). Ethograms show pausing (red, **a**) which is defined as not moving and not grooming or wandering (dark red, **b**) which is defined as moving around in the chamber.

1551  
1552  
1553  
1554  
1555  
1556  
1557  
1558



1559

1560

1561
